# Supplementary material for: Genome-Wide Analysis of BpYABs and Function Identification Involving in the Leaf and Silique Development in Transgenic Arabidopsis
Source: Int J Mol Sci. 2022 Jan 31;23(3):1670. doi: 10.3390/ijms23031670 (PMC8836020; doi:10.3390/ijms23031670)
Supplement: Supplementary file 1 [file ijms-23-01670-s001.zip]

Archive with 9 entries (9 files):
- Caption of Supplementary files.pdf
- Fig. S1.tif
- Fig. S2.tif
- Fig. S3.tif
- Fig. S4.tif
- Fig. S5.tif
- Fig. S6.tif
- Fig. S7.tif
- Supplemtary Table 1-9_2022-1-30.xlsx
