# Supplementary material for: Genome-Wide Analysis of BpYABs and Function Identification Involving in the Leaf and Silique Development in Transgenic Arabidopsis
Source: Int J Mol Sci. 2022 Jan 31;23(3):1670. doi: 10.3390/ijms23031670 (PMC8836020; doi:10.3390/ijms23031670)
Supplement: Supplementary file 1 [file ijms-23-01670-s001.zip › Supplemtary Table 1-9_2022-1-30.xlsx]

## Sheet: Table S1
Table S1 Protein sequences were used to constructed the evolutionary tree.
Species	Numbers of YABBY gene	Gene ID	Protein Sequences	Length of anino acid
Amborella trichopoda	5	>AmTr_v1.0_scaffold00004.182	MSLENASEHVCYVQCNLCNTILAVSVPGSCLFTIVTVRCGHCTNLLSMNMGALLQTIPFHDLQNQSVAPQERQRMEDGSSSKSIKDSETIPSENEEPRTIPNRPPEKRQRVPSAYNRFIKEEIQRIKARNPEITHREAFSTAAKNWAHFPHLHYGLSLERNNQVTLDEVLVNEGSQSDPIIHQAVLGLGPLQPYPRQARGRPYKDQGQRS	210
		>AmTr_v1.0_scaffold00047.126	MDFLPGSTDHLCYVRCNFCDTLLAVGVPCRRLMDTVTVKCGHCSHLSFLSARPLLQNQSLELLSTQNFCGDNKKSQQSSSSSPLTPNQQVVPKVPNVVKPPEKKHRLPSAYNRFMKEEIKRIKAGNPEIPHREAFSMAAKNWARFDPQLLHGSTTSTQIEKQVKPNQEIHEMVTAGGRVKQEDMRQLQAAARSQIT	196
		>AmTr_v1.0_scaffold00078.9	MSNCNSSINVTSSPSPSSEHVCYLPCNFCNTILAVSVPCSSLFKVVTVRCGHCTNLLSVNMAAVLHAPSLTPAPANLQHDQLLRNQSLTGSHGYNRMMMMMTTMDSSSTSNNFNHDDINNKVLIPNESIAEKEERTVVNRPPEKRQRVPSAYNRFIKEEIQRIKASNPDISHREAFSTAAKNWAHFPHIHFGLMLDTTKKQPKLDQGSGKHLMNQAAVCIE	221
		>AmTr_v1.0_scaffold00085.9	MSSSSSFAFHPTPSEQLCYVHCNFCDTVLAVSVPCSSLFKMVTVRCGHCTNVLSVDTRGLLHPTAATQLHLGHAFFSPTPHNLLDECSPPSSLLLDHPLMTPSNTGSASTRLQENEALHSPVSRPPEKRQRVPSAYNRFIKEEIQRIKAGNPDITHREAFSTAAKNWAHFPHIHFGLMADQSIKKTNMQDGDDVLITESFFTAANMGVTPY	211
		>AmTr_v1.0_scaffold00096.22	MSSCEHIFEFPEQLCYVQCTFCDTILLVSVPCSSMLKMVTVRCGHCNNLLSVNMKLRASFLPLHLISSLTNQVPTLSLSLSQASQELRIDTPINTSSPKKDEITPPKHVNKPPEKRHRAPSAYNRFIKEEIQRLKAREPTITHKEAFSAAAKNWAHFPRIPFNVEADGCTQEEGNGDEVVLMENNE	186
Cajanus cajan	7	>C.cajan_01570	MSSSSTTLSLDHLPPSEQLCYVHCNICDTVLAVSVPCTSLFKTVTVRCGHCTNLLPVNMRGLLMPSPTQFHLGHSFFSPSHNLLEEIPNPSPNFLMNQQTNLSATNEFSMPARTVADELPRPPIINRPPEKRQRVPSAYNRFIKDEIQRIKSVNPDITHREAFSAAAKNWAHFPHIHFGLMPDQTVKKTNVCQQEGEEVLMKDGFYASANVGVSPY	216
		>C.cajan_08750	MNHDDKLTMDLVPPSEHLCYVRCNFCNTVLAVGIPCKRLLDTVTVKCGHCSNLSFLSTRPPNSQNQSIDHTLSLQGFYSNAKKGQASSSSSSPTTSNESVSPKAASFVVKPPEKKHRLPSAYNRFMKEEIQRIKAANPEIPHREAFSAAAKNWARFIPNSPSSSVSASKVNVRIHDHYYYYFHIYLYMLLQDY	193
		>C.cajan_12068	MSTLNHLFDLPEQICYVQCGFCTTILMVSVPCSSLSMVVTVRCGHCTSLLSVNMMKASFVPFHLLASLSHLEPKESSQEEDANKTLNSHSASLMTYSDCEEEDVIPISNVVNKPPEKRQRTPSAYNCFIKEEIKRLKAENPDMAHKEAFSTAAKNWANFPPTQYKGDEESSSQTDQLVDLDSQVDPPDVGVNEDEGQGFRGIKVPRNSILERTPFE	216
		>C.cajan_32629	MSSSSTSFSPDQHLSPSDQLCYVHCNFCDTVLAVSVPCTSLFKTVTVRCGHCTNLLSVNMRGLLLPATNQLHLGHSFFTPQNLLEEIRNAPSTNMMMNQLPNPNNLVMSTMRGGPEETPKPPSANRPPEKRQRVPSAYNRFIKDEIQRIKAGNPDISHREAFSAAAKNWAHFPHIHFGLMPDHQPVKKANVRQEAEDVLMKDGFFAPTNVGVSPY	215
		>C.cajan_35914	MSTLNPLFDLPEQICYVQCGFCTTILMVSVPCSSLSMVVTVRCGHCTSLLSVNMMKASFFPFHLLASVTHVEPKRGSSEDGANMTLNSYDASIMTHPDCEEENVTQMTNVNKPPEKRQRTPSAYNRFIKEEIKRLKAENPNMAHKEAFSTAAKNWANFPPSQCKGDEDSCNLTDQLLELDSNVEPSDAIEVKSYNSFQN	199
		>C.cajan_38394	MSMEMMATERVCYVHCNFCNTILAVSVPYSSMLTIVTVRCGHCANLLSVNMGASLQAFPPQDPQKQHLSFEEPSSKELGSSSKCNKIAPFEAVEHEQPRIPPIRPTEKRHRVPSAYNRFIKEEIQRIKVSNPDISHREAFSSAAKNWAHFPHIHFAGLKLDGNNKQAKLDQGEGAEKSNGFY	182
		>C.cajan_44862	MSSCSIDVAPEKLCYIPCSFCHIVLAVSVPCSNLCDIVTVRCGHCTNLWSVNMAAAFQSLSWQEVQESGHSNSQCRIDTGSTSKFCNKIQMHAPTVHVKEERVVNRTPEKRQRAPSAYNQFIKEEIQRIKANNPDISHREAFSTAAKNWAHFPHIHFGLMLESNNQDN	168
Cannabis sativa	5	>PK06964.1	MASERVCYVQCNLCNTILAVSVPCSSLFTIVTVRCGHCANLLSVNMGTSMPTMAPQDHPQSQNNKQIIVSSEGSGKEYGSSSSKSNKNKHATVEPVKHDQPIRTPPIRPPEKRQRVPSAYNRFIKEEIQRIKASNPDISHREAFSTAAKNWAHFPHIHFGLKLDGTNNKQAKLDKTIARDHHQGTQKTNGFY	192
		>PK09461.1	MAAAFQSLSWQQDHHLQAQNYNYNNSAPDYRIDSGSSSRCNINTRLAMRAPTTATTTTNITEERVVNRPPEKRQRVPSAYNQFIKEEIQRIKANNPDISHREAFSTAAKNWAHFPHIHFGLMLKTNNQTKLENNGSEKHLMPSRAALLNK	150
		>PK13838.1	MEFTPPSDHLCYVRCNFCTTVLAVALPYKRFLDTVTVKCGHCSNLSFLSTRPTPLQPHQFLDQYPLMTHLPGFCNNDHLRKGSSSGSSPSSTTSGDPMSSTGAPFVVKPPEKKHRLPSAYNRFMKEEIQRIKSANPEIPHREAFSAAAKNWARYIPHPPAGSVSGSNKRILQQ	173
		>PK16897.5	MSSSSASTILPQQLDHLSSSSEQLCYVHCNICDTVLAVSVPCSSLFKSVTLTVRCGHCTNLLPVNMCGLLLPSPNQFHLGHSFFNPASHHNLLEEIPNSAPNFLMNQSSMADFAVVPPRGVNNTRHHDHHHHHHHEISRPPVINRPPEKRQRVPSAYNRFIKDEIQRIKSVNPDISHREAFSAAAKNWAHFPHIHFGLMPDQTGKKTNVRQQEGEDVLMKDGFFASANQVGVSPY	235
		>PK18424.5	MSASSAAFSPPDHLSPSDQLCYVYCNFCDTVLAVSVPSESLYKIVTVRCGHCSNLLSVNMRGPLLPAAPNQLHFGHAFFTAPQHLLEDIRSLPSNNNLMMMNNNNNYNHHHQPNPNDLLMPIRGRAEEIPKPPVVNRPPEKRQRVPSAYNRFIKDEIQRIKAGNPDISHREAFSAAAKNWAHYPHIHLGLMPDQPVKKPVIRQQDGDDMLMKDGFFSTTPPAANVGVSPY	230
Carica papaya	5	>evm.model.supercontig_145.3	MSSSTAAFSPDHLSPSDQLCYVHCNFCDTVLAVSVPCTSLFKTVTVRCGHCTNLLSVNMRALLLPAANQLHLGHPFFTPQTLLEEIRNAPSNMLISQPCPNESVLPIRGGAEEIPKPPPVNRPPEKRQRVPSAYNRFIKDEIQRIKAGNPDISHREAFSAAAKNWAHFPHIHFGLMPDHQPVKKANVRQQEGEDVLIKEGFYSPANVGTVTPY	213
		>evm.model.supercontig_29.121	MSSSSALSSLDHLPPSEQLCYVHCNICDTVLAVSVPCTSLFKTVTVRCGHCTNLLPVNMRLLLPPANQFHLGHSFFSPSHNLLDEIQTPNPNFLTTQTNMNDFTIPSRGMADELPRPPVINRPPEKRQRVPSAYNRFIKDEIQRIKAGNPDITHREAFSAAAKNWAHFPHIHFGLMPDQPVKKTNVRQQEGEDVLMKDGFFSSANVGVSPY	211
		>evm.model.supercontig_46.14	MSSCIDVAPEQLCYIPCNFCNIVLAVSVPCSSLFDIVTVRCGHCTNLWSVNMAAAFQSLSWQDVQRAVGFCGHSCTRASGPCPDPSQQARASSANKAPKYASPEPYRIHEWGSSSKCSNKMSMRSPPNHKAAEERVVNRPPEKRQRVPSAYNQFIKEEIQRIKANNPDISHREAFSTAAKNWAHFPHIHFGLMLESNNQAKADGTHDKHLMQRAALLK	218
		>evm.model.supercontig_69.72	MVSVPCSSLSTAVTVRCGCCTSLLSVNMMKSSFVPLHLLLASLSRDGEGKKEASPKDGDGCRRLDRQSPSMLTSSDYEEEDGIHINQIVNKPPEKRQRAPSAYNCFIKEEIRRLKAHNPNMTHKEAFSTAAKNWAQFPPTHYRKDVECGENQDPSETTWNSDALEGSTAGFRERKAPRNSIWARTPFDQ	189
		>evm.TU.contig_30608.1	MDLEEKVSMDLQAPQPEHLCYVRCNFCSTVLAVGIPCKRLLDTVTVKCGHCSNLSFLSTRPPLQGQCFDHQMSLSLQEKQSFCSDLKRGQSSSSSSSTSTTSSEPLFPKAPFVVKPPEKKHRLPSAYNRFMKEEIQRIKAANPEIPHREAFSTAAKNWARYIPNSSSTGSVSGSSNA	177
Eucalyptus grandis	6	>Eucgr.B03140.1	MEDKASMEAPPSEHLCYVRCNFCNTVLAVGIPCKRMLDTVTVKCGHCSNLSFLSTRTPLQGQCLDHPLSLQQGFSSDFRRGQSSSSSSSTSGDQPLSPKAAPFVVKPPEKKHRLPSAYNRFMKEEIQRIKAANPEIPHREAFSAAAKNWARYIPHSPSGSAPGSSSHE	168
		>Eucgr.B03310.1	MATIDHLLSLSEQICYVQCGFCTTVLLVSVPCSSLSSVVTVRCGHCTTLLSVNMMKASFVPLHLLAPLSHDGPKEEFQEMEVQKNVELYSPSFVNSSEVEDEETIAITRVVNKPPEKRQRTPSAYNRFIKEEIRRLKAQNPNIPHKEAFSQAAKNWAQFPQHQFKGDNGESFVQEVEREKSISDDSIE	188
		>Eucgr.C01515.1	MASCVDITPTEQLCYIPCNFCNIVLAVSVPCSSLLDIVTIRCGHCSNLWSVNMAAAFQSLANWQDAQAPKQDCRMDMGSSSKYNSRITMRAPSTNVTEQRVVNRPPEKRQRVPSAYNQFIKEEIQRIKASNPDISHREAFSTAAKNWAHFPHIHFGLMLDNNNQAKMDNHSEKHLMSRAALLNK	184
		>Eucgr.D02474.1	MNMMSSSSSSSSGFAPDHHHHLSSPTEQLCYVHCNYCDTVLAVSVPCTSLFKTVTVRCGHCTNLLSVNMRGMLLPSANQLQLGHNYFTPQNLLEEIRNAPPSLLINQLSPADSIMQLRGGAEQIPKPPVVNRPPEKRQRVPSAYNRFIKEEIQRIKAGNPDISHREAFSAAAKNWAHFPHIHFGLMPDQPVKKTNICQQEGEDVLRKDGGLFATANVGVSPY	222
		>Eucgr.E01474.1	MSSSSAFSPDPLSPNEQLCYVHCNFCDTVLAVSVPCSSLFKTVTVRCGHCTNLLSVNMRSLLLPPAPANQLHLGHSYFTPQNLLEEIRNVPSNMLMNQTIPNEPMMQLRGGIEDIPKPPPVVNRPPEKRQRVPSAYNRFIKDEIQRIKAGNPDISHREAFSAAAKNWAHFPHIHFGLMPDHQPVKKANLRQQEGEDVLMKDGFFTPTNVGVSPY	214
		>Eucgr.J00587.1	MSVEMASERVCYVHCNFCNTILAVSVPSSSLYTMVTVRCGHCGNLLSVNMAGAVQSAPLPDTSQKQQPSSENMARGSGSSSSSRPNNNTSNKFSSFEPIEAEAPRMTPIRPPEKRQRVPSAYNRFIKEEIQRIKASNPDISHREAFSTAAKNWAHFPHIHFGLKLDGNKQGKADQAIAGDHQGTHKSHGFY	191
Medicago truncatula	7	>Medtr2g087740.1	MSMDMNMMATNERVCYVHCNFCNTTLAVSVPCSSLLTIVTVRCGHCANLLSVNMGATSLQSFTPQQDHPQKQQLINCHQEASRKEVVGSSSSSSSSSSKCKAFQPLVHEQPRTPPIRPPEKRQRVPSAYNRFIKEEIQRIKASNPDISHREAFSTAAKNWAHFPHIHFGLKLDGSKQAKLDHGVGEATQKSNGFY	195
		>Medtr4g025900.1	MSSSSSTSFSPDQQQQQQLSPSDQLCYVHCNFCDTVLAVSVPCTSLFKTVTVRCGHCTNLLSVNMRALLLPAPNQLHLGHTYFNPQTLMEEIRNAPSTNMMMNQLPNPNDLMMNTMRGGHHEEIPKPPPANRPPEKRQRVPSAYNRFIKDEIQRIKAGNPDISHREAFSAAAKNWAHFPHIHFGLMPDHQPVKKANVRQDSEDVLMKDGFFTQANVGVSPY	221
		>Medtr4g050300.1	MSMDMIATERVCYVHCNFCNTILAVNVPYSSLLTIVTVRCGHCANLLSVNMVAPLLQPFPPPQLPQPQKQHIIDEEASSKEIGSSSSKCNKIASFEAVEHPRIPPIRPIEKRHRVPSAYNRFIKEEIQRIKASNPDISHREAFSSAAKNWAHFPHIHFGKQQAKLDHGEGTREKTNGFY	179
		>Medtr4g101660.1	MSSSSTTTLSLDHLPPSEQLCYVHCTICDTILAVSVPCTSLFKTVTVRCGHCTNLLPVNMRALLLPSPNQFHLGHSFFSPTHHNLLEEMPNPAPNFMMNHINAPNDFSMPPTRTVADELPRPPIINRPPEKRQRVPSAYNRFIKDEIQRIKSVNPDITHREAFSAAAKNWAHFPHIHFGLMPDQTMKKTNVCQQEGDDQILMKDGGFYASANLGVSPY	218
		>Medtr4g114730.1	MSSCSIDVAPAAAEQLCYIPCNFCNIVLAVSVPCSSLFDIVTVRCGHCTNLWSVNMAAAFQSLSWQDVQAPSHCMNPEYRIRTSSTPKCNDRIAMRSAPTTHVTEERVVNRPPEKRQRVPSAYNQFIKEEIQRIKANNPDISHREAFSTAAKNWAHFPHIHFGLMLESNNQAQIENVSEKRLMSRSALMNK	191
		>Medtr5g034030.1	MSTLNHLFDLPEQICYVQCGFCNTILMVSVPCSSLTMVVTVRCGHCTSLLSVNMMKASFVPFHLLASLTHLEQKESSSPDEDANKTLNSNTSASMMTYSDCEEDDVIPISNVVNKPPEKRQRTPSAYNRFIKEEIKRLKAKNPDMAHKEAFSTAAKNWANCPPTQCKGDEESCSQTDQFVDLDSQVDPNEAEVNEEEQGFRGRKVPRNSILERTPFE	217
		>Medtr5g046230.1	MNHEEKVTMDLVPPSDQHLCYVRCNFCNTVLAVGIPCKRLLDTVTVKCGHCSNLSFLTTRPPSSKNQTVDHTLSLQGIYSSKKGQPSSSSSPTTSTESLSPRPPPFVVKPPEKKHRLPSAYNRFMKEEIQRIKVANPQIPHREAFSAAAKNWARYIPNSPTSSISATKRNIVFVRFRLSDQLQSSADQINDFGVFNVADPETWIFRRLKYSHMCRL	216
Populus trichocarpa	12	>Potri.001G120200.1	MSSSSSLSLDHLPPSEQLCYVHCNICDTVLAVSVPCTSLFKTVTVRCGHCTNLLPVNMRGLFLPSASQFPLGHNLYSPSHNLLDDQIPNPTPNFLINQTHVNDFSVTVRGMADHELPRPPVIHRPPEKRQRVPSAYNRFIKDEIQRIKAGNPDISHREAFSAAAKNWAHFPHIHFGLMPDQAMKKNNVRQQEGEDVLINDGFFASSNVGVTTPY	214
		>Potri.002G145100.1	MSSSSAAFGPDHLSSSEQLCYVHCNFCDTVLAVSVPCTSLYKTVAVRCGHCTNLLSVSMHGLLPAANQFYLGHGFFNPQNILEEIRNGAPPNLLINQPHPNESVIPFRGVEEIPKPPMVNRPPEKRHRVPSAYNRFIKDEIQRIKAGNPDISHREAFSAAAKNWAHFPHIHFGLMPDQPVKKANVRQQEGEDVLMKDEFFAAANVGVTPY	210
		>Potri.003G112800.1	MSSSSTLSLDLLPSSEQLCYVHCNICDTVLAVSVPCTSLFKTVTVRCGHCTNLLPVNMRGLLLPSANQFHLGHSFFSPSHNLLDEIPNPTPNFLINQTNVNDFSVPVRGMADHELPRPPVINRPPEKRQRVPSAYNRFIKDEIQRIKAGNPDISHREAFSAAAKNWAHFPHIHFGLMPDQMVKKTNVRQQEGEDVLMKDGFFSSANAGVPTPY	213
		>Potri.006G067800.1	MSSCIDAVPNEQLCYIPCNFCNIVLAVSVPCSSLFDIVTVRCGHCTNIWSVNMAAAFQSLSWQDQVQASNYNSHDYRIDLGSSSKCNNKISMRTPAANIVTQERVVNRPPEKRQRVPSAYNQFIKEEIQRIKANNPDISHREAFSTAAKNWAHFPHIHFGLMLETNNQTKVDDGSEKRLMSRSALQNN	188
		>Potri.008G097800.1	MNLEEKASTEVPSSEHLCYVRCNFCNTVLAVGIPCKRLLDTVTVKCGHCNNLSFLSTRPPNQGQCLDQYHRLSLQGVSSNEKFLFKEKQGFCTDIRKGESSSSSTSSEQPVPTVPFVVKPPEKKHRLPSAYNRFMKEEIKRIKAADPEIPHREAFSTAAKNWARARYLPKSGAGSGSPNI	180
		>Potri.008G189000.1	MSTLNHLFDLPDQICYVQCGFCTTILLVSVPCSSLSTVVTVICGHCTSLFSVNMKKFSFLPFNRSTSLSYEDEQKEQLRPEFNAQKGLEMQNSFMAISSNNDEDDRINQVNRVINKPPEKRQRGPSAYNRFIKEEIRRIKTENPRIAHKEAFSTAAKNWAHSPLVQYCKDIDGESSGLEEENGSWSCDAADQFQVNVESKGLHERKVPRHFMWAKTPFE	219
		>Potri.010G042400.1	MSTLNHLFDPPDQICYVQCGFCTTILLVSVPCSSSSTVVTVICGHCSSLLSVNLTKISFLPFNLLTSLSHDQERKELLSPDEVNAQKGLDTQSSFIAISSDNDEDIDKVNPVNRVINKPPEKRQRAPSAYNCFIKEEIRRLKTENPNMAHKEAFSTAAKNWAHCPHVHYKGDGESIGLEEENSTWSSDAAEVNIESKGFHERKVPRHYMWAKTPFE	216
		>Potri.014G066700.1	MASSSAAFSPDHLSSSDQLCYVHCNFCDTVLAVSVPCSSLFKTVTVRCGHCTNLFSVNMRSLLPAANQFYLGHGFFNPQINILEGMRSTGAPPSLMINQPNPNESVMPIRGVEEIPKPPVVNRPPEKRQRVPSAYNRFIKDEIQRIKAGNPDISHREAFSAAAKNWAHFPHIHFGLMPDQPVKKTNVRQQEGEDVLMKDGFFAPANVGVTPY	212
		>Potri.016G067300.1	MSLDIASERVCYVHCNFCNTILVVNIPCSANSILLNTVTVRCGRCANLLSLNTGSLLQTSHPQNSHKQNLLYQDLSEGSQSSSSGNKVSALEPSQNEQPGRTVAVHAATGKKQQRSPSAYNRFIKEEIRRIKEKNPEISHREAFSNAAKNWAHLPHTQSGLTLNDTGMDA	170
		>Potri.018G129800.1	MSSCVDVVPHEQLCYIPCNFCNIVLAVSVPCSNLFDIVTVRCGHCTNLWSVNMAAAFQSLSWQDHVQASNHISHDYRIDMGSSSKFNNKISTRTPATNIVTQERVVNRPPEKRQRVPSAYNQFIKEEIQRIKANNPEISHREAFSTAAKNWAHFPHIQFGLMLETNNQAKLDDGSDKHLMSRSALLNN	188
		>Potri.001G214700.3	MSLELVSEPVCYVHCNLCNTILAVSVPSSSLFNIVTVRCGHCGNLLSVNMGASLQTLPLQDPQSQKLLLINSEDLNKNFGSSSKCNKVTASESTEHEPPRMPAIRPPEKRQRVPSAYNRFIKEEIQRIKASNPDISHREAFSTAAKNWAHFPHIHFGLKLDSNKHAKLDHQSFAGEGTQKTSGLYEINGSL	191
		>Potri.010G154350.2	MNLEEKVIDTDVLSSDHLSYVRCNFCNTVLAVRIPFKRMLDTVTVKCGHCNNLSFLSTRSPNLGNFLDIDHHHLSLQGVSSNEKLLFKETQGFCTDFRKGEYSSSSTSSEPLVPKVPFVVKPPEKKHRLPSTYNRFMKEEIQRIKAANPEIPHREAFSTAAKNWARYLPNSGAGSGGSKN	180
Prunus persica	6	>Prupe.1G250500.1	MSALNHLFDLPDQICYVQCGFCATILLVSVPCSSLSMLAVTVRCGHCSCLLSVNMMKASFVPLHLLASLTQDEQREELCLEEVDKQNNNPLDMRSPSMVISNSDNEEEDTISMNPIVNKPPEKRQRAPSAYNHFIKEEIRRLKAENPSMTHKEAFSTAAKNWAQFPPIQYKGDGPDGESCTSQREENVTWDSDVPEAHEDGKVYRERKAPRHSIWARTPFE	221
		>Prupe.1G290100.1	MNLEEKVTMDLINQPSEHLCYVRCNFCSTVLAVGLPFKRLLDTVTVKCGHCSNLSFLSTRPALQGQCLSDHPTSLTLQQAGCCSEFRKGQSSSSSSPISSEPSSPKAPFVVKPPEKKHRLPSAYNRFMKEEIQRIKAANPEIPHREAFSAAAKNWARYIPSPSAGSDSGSCSSTNNILQE	180
		>Prupe.2G140400.1	MSSAAASSTAFNSPDQQQQQQHLLSPSDQLCYVHCNFCDTVLAVSVPCSSLFKTVTVRCGHCSNLLSVNMRALLLPPPNNQHLPHPFFNTPHNLLQEDMRNAPSSNTLMNQQPNYTNESIMAIRGGGLDHQEIPKPPAAVNRPPEKRQRVPSAYNRFIKDEIQRIKAGNPDISHREAFSAAAKNWAHFPHIHFGLMPDQPVKKTNMRQQEGEDMLMKDGFFSTPANVGVSPY	232
		>Prupe.5G075800.1	MSSSSSASTLSLDHLPPSEQLCYVHCNICDTVLAVSVPCTSLFKTVTVRCGHCTNLLPVNMRGLLLPSPNQFHHLGHSFFSSPNNSHNLLEEIPNPAPNFLMNQTSVNDFAVRPRGGADELPRPPAITRPPEKRQRVPSAYNRFIKDEIQRIKSVNPDISHREAFSAAAKNWAHFPHIHFGLMPDQTVKKTNVRQQEGEDVLMKDGFFASANNVRVSPY	219
		>Prupe.6G147600.1	MSMDLMASERVCYVHCNFCNTILAVSVPCNSLQNMVTVRCGHCANLLSVNMGASLQSNAFPSQDPQLQKHHLSSEDSNKSCGSSSSSKCSKFSHPFESVELHDQPSISPIRPPEKRQRVPSAYNRFIKEEIQRIKASNPDISHREAFSTAAKNWAHFPHIHFGLKLDGSKQPKLDQTFAGGDQGTQKSSGFY	192
		>Prupe.7G245200.1	MTSCIDVATEQLCYIPCNFCNIVLAVSVPCSSLLDIVTVRCGHCTNLWSVNMAAAFQSLWPDVQAQNYNYNAQNYRIESGSSSKCNKKIATRDPTADHVTEERGVNRPPEKRQRVPSAYNQFIKEEIQRIKANNPDISHREAFSTAAKNWAHFPHIHFGLMLETNNQPKLDNDSEKHLISRAALLNK	187
Solanum lycopersicum	9	>Solyc01g010240.2.1	MSSSSPNSSCLNLLESADHKINTMDPSEHLCYVRCSFCNTILAVGIPCKKLLDTVTVKCGHCGNLSFLSSRPPIQPQFFDHQPILQHQDFFNNFKKGQSSSSSEPSSPKAPFVVKPPEKKHRLPSAYNRFMKDEIQRIKAAHPQIPHREAFSAAAKNVHSKYSKWDLG	168
		>Solyc01g091010.2.1	MSSSSAAFAPDHHLHHHHLSPPSGEQLCYVQCNFCDTVLAVSVPCSSFFKNVTVRCGHCTNLLSVNIILPTAANQLHLPHSFFSPHNLLDEIRNNPPSLLMNQQINPNESLMPVRGGVDEIPKPPVANRPPEKRQRVPSAYNRFIKDEIQRIKAGNPDISHREAFSAAAKNWAHFPHIHFGLMPDQPVKKPNACQQEGEDVLMKEGFLAPANIGVSPY	218
		>Solyc05g005240.1.1	MSTLNNHLFELQDTICYVQCGYCTTILLVSVPCSSLCNKVVTVRCGHCTTLLSLNLIKPSLHLFASFDQTHQPPEVDKDETDDANKKNSNSDEEDQLENNVLPLNQVVNKPPEKRQRAPSAYNCFIKEEIKRLKTLYPNMTHKQAFSTAAKNWAHFPPSQHRGGCSLGERKMAKVSAARNSMVPRDSNGLIP	192
		>Solyc05g012050.2.1	MDYVQSSEHLCYVRCNFCNTVLAVGIPYKRLMDTVTVKCGHCSNLSFLTTRPPIQGQCFDHQPNIQGYCSELKNKGQASSSTSSTSSEPLSPKAPFVVKPPEKKHRLPSAYNRFMKEEIQRIKSENPEIPHREAFSAAAKNWARYLPNPPNSGNTNNV	158
		>Solyc06g073920.2.1	MSLDMTYSSSSSERVCYVHCNFCSTILAVSVPCNSMMTIVTVRCGHCANLLSVNIAPSLQSLPIQDLQRQNESSIEDGMSRGYGSSSSSTNSFHRFSPIPTDHDQPRSPPIRVPEKRQRVPSAYNRFIKEEIQRIKASNPDISHREAFSTAAKNWAHFPHIHFGLKLDGNKQTNKLDHAVAGEGPQKTIGLY	192
		>Solyc07g008180.2.1	MASCIDVASDQLCYIPCNFCNIVLAVSVPCSSLFDIVTVRCGHCTNLWSVNMAAAFQSSSSASWQNHQVPNYTAPEYRMDFGSSTKCNMNRMSMRTPITNNVHEERIVNRPPEKRQRVPSAYNQFIKEEIQRIKANNPDISHREAFSTAAKNWAHFPHIHFGLMLESNNQAKLACGSRKL	180
		>Solyc08g079100.2.1	MSSSNSLSLDHLPPPPPSEQLCYVHCNVCDTVLAVSVPCTSLFKTVTVRCGHCTNLLPGWLLPSTNHHHHHFGHTYFSPSHNLLDEISNATPNFLMNQSNSAHEFVQLPARPGFDDLPRPPPVVNRPPEKRQRVPSAYNRFIKEEIQRIKAGNPDISHREAFSAAAKNWAHFPHIQFGLMPDQTVKRTNVRQQDGEDVLTKDGLFNTSANVSVSPY	216
		>Solyc11g071810.1.1	MSFDMTFSSSPSSERVCYLQCNFCNTILAVSVPCSNMLTLVTVRCGHCANMLSVNIGSLIQALPLQDVQKLQRQQYTNVENNSSNYKAYGSSSSSSSKFNRYSSIVSPQIEPKIPSIRPPEKRQRVPSAYNRFIKEEIQRIKASNPDISHREAFSTAAKNWAHFPHIHFGLKLEGNK	177
		>Solyc12g009580.1.1	MSSSYIDSTNFEKLCYIPCNFCNIVLVVSVPCSNLLDIVTVRCGHCTNLWSVNMAAAFHTNSWQNHLHHQVGNYTNSPHDQYKVDFASSSITNNSTLEERNVNRPPEKRQRGPSAYNQFIKEEIQRIKANNPDITHREAFSTAAKNWAHFPHIQFGLMLETDNQAKLGASENKEKLIMHRAALPKIKTFTF	191
Theobroma cacao	7	>Thecc1EG005549t1	MSSSSAAFSPDHLSPSDQLCYVHCNFCDTVLAVSVPCTSLFKTVTVRCGHCTNLLSVNMRGLLLPAANQLHLGHSFFTPQNLLEEIRSAPPNMLINQPNPSDTVMPAIRGGVEEIPKPPVVNRPPEKRQRVPSAYNRFIKDEIQRIKAGNPDISHREAFSAAAKNWAHFPHIHFGLMPDQPVKKTNVRQQEGEDVLMKDGFFASTNVGVTPY	212
		>Thecc1EG010411t1	MSTLNHLFDLPEQICYVQCGFCTTILLVSVPCSSLSMVVTVRCGHCSSLLSVNMMKASFVPLQLLASLGHDHDDEPKEGAVCEEVAAPRKTAAHRRSPSLMTSSDNEEEDIVRVNPTVNKPPEKRQRAPSAYNRFIKLIPGGREEIRRLKAQNPNIPHKEAFSTAAKNWAHFPPMDTKGDGESCGLDEGQALWNSDATQVLHVSRFDGKNKFTYKAMLSVKEKPQGVPYGPRHRLREDALDIDFY	245
		>Thecc1EG011484t1	MNLEEKVGMDLVPQSEHLCYVRCNFCNTVLAVGIPCKRLLDTVTVKCGHCSNLSFLSTRPPLQGQCLDPQTSLSLQSFCGDFRKGQSPSPSSSPSSEPSSPKAPFVVKPPEKKHRLPSAYNRFMKEEIQRIKAANPEIPHREAFSAAAKNWARYIPNSPATSVSGSRSNE	170
		>Thecc1EG016030t1	MSSSSTLSLDHLPPSEQLCYVHCNICDTVLAVSVPCTSLFKTVTVRCGHCTNLLPVNMRGLLLPSANQLHLAHSFFSPSHNLLEEISNPSQNFLLNQTNTNDFALPTRGVADELPRPPVINRPPEKRQRVPSAYNRFIKDEIQRIKAGNPDITHREAFSAAAKNWAHFPHIHFGLMPDQTPKKTNVRQQEGEDVLIKDGFFASANVGVSPY	211
		>Thecc1EG031868t1	MSSSNNSAPEQLCYIPCNLCNIILAVNVPCSSLFETVTVRCGQCTNLCSVNLATSFPSRAGKDIQVPSYTSSEYRIDLGSSSRCKNKLPKRATTVNTTPERVVNRPPDKRHRAPSLYNQFIKEEIQRIKLNNPDITHREAFSTAAKNWARFPHIHFGLMLETDNQPKLNDDSTEHFQQLLK	181
		>Thecc1EG038105t1	MSSCIDVAPEQLCYIPCNFCNIVLAVSVPCSSLFDIVTVRCGHCTNLWSVNMAAAFQSLSWQDVQAPNYATQDYRTELGSSSKCNKLSMRTPANNVTEERVVNRPPEKRPRVPSAYNQFIKEEIQRIKANNPDISHREAFSTAAKNWAHFPHIHFGLMLETNNQNKLDDASEKHLMSRTALLNK	184
		>Thecc1EG041175t1	MSLDLSSERVCYVHCNFCNTILAVSVPCTSLFNIVTVRCGHCANLLSVNMGTSLQTVPIQDAQKEQINTDQDHSNKECGSSSKCNKFSAFDSAEHEAPRMPPIRPPEKRQRVPSAYNRFIKEEIQRIKASNPDISHREAFSTAAKNWAHFPHIHFGLKLDGNKQAKLDQAFAEGTQKSTGFY	182
Vitis vinifera	7	>GSVIVT01001269001	MSSSSTLSLDHLPPSEQLCYVHCNICDTVLAVSVPCTSLFKTVTVRCGHCTNLLPVNLRGLLLPSANQLHLGHAFFSPSHNLLEEIPNPSPNFLINQTTANDFSVSARGGADELPRPPVINRPPEKRQRVPSAYNRFIKDEIQRIKAGNPDITHREAFSAAAKNWAHFPHIHFGLMPDQTMKKTNVRQQEGEDVLMKDGFFASANVGVSPY	211
		>GSVIVT01012246001	MDLVPPSEHLCYVRCNFCNTVLAVGIPCKRLLDTVTVKCGHCSNLSFLSTRPPLQGQCLDHQMSLQGVCNDFRKGQSSSSSSSTSSEPVSPKAPFVVKPPEKKHRLPSAYNRFMKEEIQRIKVANPEIPHREAFSAAAKNWARYIPNSPAGSVSESSNNE	160
		>GSVIVT01013778001	MSTLNHLFDLQEQICYVQCGFCTTILLVSVPYSSLSMVVTVRCGHCASLLSVNMMKASFVPLHLLASLSQDEPKEGCPNEEGAQKASDKRSPSMVASSDNEEDDIVPVHHVVNKPPEKRQRAPSAYNRFIKEEIRRLKAENPKMTHKEAFSTAAKNWAHFPAIQLKGAGESCSQER	176
		>GSVIVT01015567001	MSSCIDVASEQLCYIPCNFCNIVLAVSVPCSSLFDIVTVRCGHCTNLWSVNMAAAFQSLSWQDVQAPNYTSPDYRIDLGSSSKCNTKMAMRAPASNISEERIVNRPPEKRQRVPSAYNQFIKEEIQRIKANNPDISHREAFSTAAKNWAHFPHIHFGLMLETNNQPKLDEGSEKHLMSKAALRNK	185
		>GSVIVT01022586001	MSLDIASERVCYVHCNFCNTILAVSVPCTSVFNAVTIRCGHCANLLSVNMGALLQTVPLHDLQKENLLFQASSKECGSSSKFHKVAAMDSSDNEQPRMLPKGAAQEKKQRVPSAYNRFIKEEIQRIKANNPDISHKEAFSTAAKNWAHFPHIHFGLTLNNSKSDKANFDEAFSGEGPRKTQGFY	184
		>GSVIVT01027648001	MSSSSAFSPDHLSPTSDQLCYVHCNFCDTVLAVSVPCTSLFKTVTVRCGHCTNLLSVNMRGLLLPAANQLHLGHSLFSPHNILEEIRSPPSSMLINQPNPNEAVMPVRGVDEIPKPPVVNRPPEKRQRVPSAYNRFIKDEIQRIKAGNPGISHREAFSAAAKNWAHFPHIHFGLMPDQPVKKANVRQQEGEDMLMKDGFFAPANVGVSPY	210
		>GSVIVT01037533001	MSLDITPERVCYVHCNFCNTILAVSVPCTSLFTIVTVRCGHCANLLSVNMGALLQTVPTQDLQSQKQQLSCGDPSEDCGSSSKCNKFSAFESAEHEQPRMPPIRPPEKRQRVPSAYNRFIKEEIQRIKASNPDITHREAFSTAAKNWAHFPHIHFGLKLDGNKQGKLDQAFAGEGPHKAHGFY	183
Ziziphus jujuba	5	>XP_015866124.1	MSSSSSSSSSSSSTLSLDHLSPSEQLCYVHCNICDTVLAVSVPCTSLFKTVTVRCGHCTNLLPVNMRGLLLPSPNQFHLGHSFFTPSHNLLEEIPNPTSNFLMNQTSMNDFAVQPRVGGGGVDELSRPPVINRPPEKRQRVPSAYNRFIKDEIQRIKSVNPDISHREAFSAAAKNWAHFPHIHFGLMPDQTVKKTNVRQQEGEDVMMKDGFFASANVGVSPY	222
		>XP_015873163.1	MSLEMMASERVCYVHCNFCNTILAVSVPCSSLFTIVTVRCGHCANLLSVNMGASLQTIPPQDPTQLQKQKQSTDDSSGKESGSSSKCNNKLSAIESVEHEQPRLPPIRPPEKRQRVPSAYNRFIKEEIQRIKASNPDISHREAFSTAAKNWAHFPHIHFGLKLDGPNKQAKLDPAIAGDGTQKPNGFY	188
		>XP_015873164.1	MSLEMMASERVCYVHCNFCNTILAVSVPCSSLFTIVTVRCGHCANLLSVNMGASLQTIPPQDPTQKQKQSTDDSSGKESGSSSKCNNKLSAIESVEHEQPRLPPIRPPEKRQRVPSAYNRFIKEEIQRIKASNPDISHREAFSTAAKNWAHFPHIHFGLKLDGPNKQAKLDPAIAGDGTQKPNGFY	186
		>XP_015888995.1	MQPSSAAFSPDHHLSPSDQLCYVHCNFCDTVLAVSVPCTSLFKTVTVRCGHCSNLLSVNMRALLLPAAAANQLHFGHNLLNPQHLLEDIRSTTPSNILINNQPNQINEPLIPIRGGAEEIPRPPVVNRPPEKRQRVPSAYNRFIKDEIQRIKAGNPDISHREAFSAAAKNEGEPDMLLKDGYFTPANVGVSPY	193
		>XP_015894702.1	MSTLNHFFDLSEQICYVQCGFCTTILLVSVPCSSLSMVVTVRCGHCTGLLSVNMMKASFVPLHLLASLSQVEKKEEVYNMEEVEADNPMDRRSPAICSDNEEGDNIVSVNHIVNKPPEKRQRAPSAYNHFIREEIRRLKAENPKMAHKEAFSTAAKNWAHFPPIEFKGDGESCSQREENLASWDSDVTVNEVHEEGNFFHERKVQRNSENEQRHPLSE	218
Broussonetia papyrifera	6	>BpYAB1	MNMEEKVTVDFVPPSTDHLCYVRCNFCSTVLAVALPYKRLLDTVTVKCGHCSNLSFLSTRPPLQPAHQFLDHPLSLPGFCNEFRKGHYSCSSSSSSSTSSEPMSPKAPFVVKPPEKKHRLPSAYNRFMKEEIQRIKAANPEIPHREAFSAAAKNWARYIPNPPAASVSGGNKRVQQGLQE	180
		>BpYAB2	MSLDLMASERVCYVHCNFCNTVLAVSVPCSSLFTIVTVRCGHCGNLLSVNMGAASLQTVPPQDPQLQKQIPSSEDPGKEYGSSSKCNKHASLESLEHEQPARSPPIRPPEKRQRVPSAYNRFIKEEIQRIKASNPDISHREAFSTAAKNWAHFPHIHFGLKLDGSKNKQAKLDQTMAGDHHGTQTTNGFY	190
		>BpYAB3	MSSSSASTLSLDHLPPSEQLCYVHCNICDTVLAVSVPCTSLFKTVTVRCGHCTNLLPVNMRGLLLPSTNQFHLGHSFFTAPHHNLLEEIPNPAPNFLMNQTSMTDFAVPPRGVAHDHHELSRPPVINRPPEKRQRVPSAYNRFIKDEIQRIKSVNPDISHREAFSAAAKNWAHFPHIHFGLMPDQTAANKKTNVRQEAGEDVLMKDAGFFASAANHVGVGPY	222
		>BpYAB4	MSASSAAFSPDRLSPSDQLCYVHCNFCDTVLAVSVPSGSLFKTVTVRCGHCTNLLSVNMRGLLLPASGPNQLQYLGHSFFSPQQYLLEDLMMRSPPAPPSNVMMNQTNPNHDLVMIPTRGRSAAEEIPKPPVVNRPPEKRQRVPSAYNRFIKDEIQRIKAGNPDISHREAFSAAAKNWAHFPHIHLGLMPDHQPVKKANMRQQEADNMLMKDGFFSAPANVGVSPY	226
		>BpYAB5	MSSCVDVAPEQLCYIPCNFCNIVLAVSVPCSSLFDIVTVRCGHCTNLWSVNMAAAFQSLSWQQDHHHLQAQNYNCNVPDYRIDSGSSSRCNLNKLAVRAPNGNHVAEERVVNRPPEKRQRVPSAYNQFIKEEIQRIKANNPDISHREAFSTAAKNWAHFPHIHFGLMLKTNNQTKLDNGSEKHLMPSRAALLNK	194
		>BpYAB6	MSALNRLLDLSEQICYVQCGFCTTILLVSVPCSSMSMVVTVRCGHCTALLSVNMMKASFVPLHLLADSLTQDEQKEEEDLEEVETQNEIDIHNHPVVSSDNEDGDIISDNQIVNKPPEKRQRAPSAYNQFIREEIKRLKAENPNMAHKEAFSTASKNWAHFPPIEYKEDEEAAARGRKM	179
Gossypium hirsutum	23	>Gh_A01G0376	MSSSHNSAPEQLCYIPCNLCNIILAVNVPCNSLFETVTVRCGQCTNLCSVNLAASFQSRAGKDVQVPNYTSSEYRIDLGSSSRCKNKLPKRATTINTTTQERIVNRPPDKRHRAPSLYNQFIKEEIQRIKLNNPDITHREAFSTAAKNWARFPHIHFGLMLETDNQPKLNDDSTEPFHQLLK	182
		>Gh_A01G1348	MASDKEIKKVSVPCNSLSMVVTVRCGHCTSLLSVNMMKASFVPLHLLASFAHDDEPKEEAVSEEVGGHRKTSDRRSPSLMSSSDNGEEDIVRVNPTVNKPPEKRQRAPSAYNRFIKEEIRRLKTQNPNIPHKEAFSTAAKNWAHFPPIHKHNKGEGVSCERDEGEASWNVEATEVHIQGNDFRERKAARNSIWTKSPFE	199
		>Gh_A03G0924	MNLEDKVGMDLVPQSEHLCYVRCNFCNTVLAVGIPCKRLLETVTVKCGHCSNLSFLSTRPPLQGQCLDPQTSLTLQSFCGDFRKGTQFPSPSSSTSSEPSSPKAPFVVKPPEKKHRLPSAYNRFMKEEIQRIKAANPEIPHREAFSAAAKNWARYIPNSPAASSVCGSSSNVSNQIHYIYIYNGKNVLIMGFGEGLL	197
		>Gh_A04G0351	MSSFNNSAPEQLCYIPCNLCNIILAVNVPCSCLFETVTVRCGQCTNLCSINMAASFQSRAGKEIQVPDYTSSEYRMELGSSSSKGKNKLPKRPTIMNTTTQERVVNRPPDKRHRAPSLYNQFIKEEIQRIKLNNPDISHREAFSTAAKNWARFPHIHFGLMLETGTQPKLNDDSTEHFQQLLK	183
		>Gh_A05G0082	MSNCIDVAPEQLCYIPCNFCNIVLAVSVPCSSLFDIVTVRCGHCTNLWSVNMAAAFQSLSWQDIQAPNHAMQDYRMKESGSSSKCNKFPMRPPANNVVTEERVVNRPPGKRQRVPSAYNQFIKEEIQRIKANNPDISHREAFSTAAKNWAHFPHIHFGLMLEANNQTKLHDASEKHIMSRTALFNK	186
		>Gh_A06G0472	MSSCIEVVPEQLCYIPCNFCNIVLAVSVPCSSLFDIVTVRCGHCTNLWSVNMAAAASQSLSWQDIQAPNNAIEDYRRDLGSSSKCSHNKLSMRPPLPNNATEERVVNRPPEKRQRVPSAYNRFIKYDILNTINLYGRLNIQRIKANNPDISHREAFSTAAKNWAHFPHIHFGLMLETNNQTKMNNVSG	188
		>Gh_A07G0308	MSTCTNVVPEQLCYIPCNFCNIVLAVSVPCSSLFDIVTVRCGHCTNLWSVNMAAAFQSLSWQDVQAASYATQDYRTDLGSSSKCNTKFSMRAPSKNATEERVVNRPPEKRQRVPSAYNQFIKEEIQRIKANNPDISHREAFSTAAKNWAHFPHIHFGLMLENQKSN	166
		>Gh_A07G1044	MSMGLTSERVWYVHCNFCNTILAVSVPCNSAFNIVTVRCGHCANLLSVNMGTSLQTVPSQDAQKQQITIDEDHSNKECGSSSKCNKFSAVDSTEQEATRMPPIRPPEKRQRVPSAYNRFIKEEIQRIKASNPDISHREAFSTAAKNWAHFPHIHFGLKLEGSKQAKLDQGYADQGSQKSNGYC	183
		>Gh_A07G1363	MSSSSAAFSPDHVSPSDQLCYVHCNFCDTVLAVSVPRTSLFKTVTVRCGHCTNLLSVNMLGLLLPTTNQHHVGHSFFTPHNLLEEIRSSATTNMVINQPNPNNSLMPPIHGGVEDIPKPPVVNRPPEKRQRVPSAYNRFIKDEIQRIKAGNPDISHREAFSAAAKNWAHFPHIHFGLMPDQPVKKTNVHQQEGEEMVMKDGFFAPNNVGVTPYQTSPNYC	220
		>Gh_A09G0958	MSLDLASERVCYVHCNFCNTILAVSVPYNSLFKFVTVRCGHCANLLSVNMGTSQQTVPIQDAQKQQIINIDEDPSNKECGSSSKCNKQFSGFDSAQNEAPRMPPIRPPEKRQRVPSAYNRFIKEEIQRIKASNPDISHREAFSTAAKNWAHFPHIHFGLKLEGNKQAKLDQSFADQGAQKSNPYY	185
		>Gh_A11G0723	MSSSSVSFSSDHLSPADQLCYVHCNFCDTVLAVSVPCSSLFNNTVMVRCGHCTNLLSVDMRGLLLPTANQLHLAHSFFTPQNLLEEIRSCAPPNMVMINHPNPNDTVIRGAAELEEIAKPPVVNRPPEKRQRVPSAYNRFIKEEIQRIKAGNPDISHRDAFSAAAKNWAHFPRIHFGQMPDQAVMKMKNNVRQQEGEEAVVKDGFFVPTNVGVSPY	216
		>Gh_A12G1991	MSSSSTLSLDHLPPSEQLCYVHCNICDTVLAVSVPCTSLFKTVTVRCGHCTNLLPVNMRGLLMPSANQFHLPHNFFTPSHNLLEEISNPSPNILLNQGNTSDITLPTRGVVDELPRPPVINRPPEKRQRVPSAYNRFIKDEIQRIKAGNPDITHREAFSAAAKNWAHFPHIHFGLMPDQPAKRTNVRQQESEDVLMKDGFFASANVGVTPY	211
		>Gh_D01G1535	MSTLNHLFDLPEQICYVQCGFCTTILLVSVPRSSLSMVVTVRCGHCTSLLSVNMMKASFVPLHLLASFAHDDEPKEGAVSEEVGGHRKTSDRRSPSLMSSSDNGEEDIVRVNPTVNKPPEKRQRAPSAYNRFIKEEIRRLKTQNPNIPHKEAFSTAAKNWAHFPPIHKHNKGEGESCEQDEGEASWNVEATEVGFKIICPFLGDAVGNEVFTASLY	216
		>Gh_D01G2326	MSSSHNSAPEQLCYIPCNLCNIILAVNVPCNSLFETVTVRCGQCSNLCSVNLAASFQSRAGKDVQVPNYTSSEYRIDLGSSSRCKNKLPKRATTINTTTQERVVNRPPDKRHRAPSLYNQFIKEEIQRIKLNNPDITHREAFSTAAKNWARFPHIHFGLMLETDNQPKLNDDSTEPFHQLLK	182
		>Gh_D02G1305	MNLEDKVGMDLVPQSEHLCYVRCNFCNTVLAVGIPCKRLLETVTVKCGHCSNLSFLSTRPPLQGQCLDPQTSLTLQSFCGDFRKGTQFPSPSSSTSSEPSSPKAPFVVKPPEKKHRLPSAYNRFMKEEIQRIKAANPEIPHREAFSAAAKNWARYIPNSPAASSVCGSSSNVSKQIHYIYIMVKMF	186
		>Gh_D05G0144	MSNCIDVAPEQLCYIPCNFCNIVLAVSVPCSSLFDIVTVRCGHCTNLWSVNMAAAFQSVSWQDIQAPNHAMQDYRMKESGSSSKCNKFPMRPPANDVVTEERVVNRPPGKRQRVPSAYNQFIKEEIQRIKANNPDISHREAFSTAAKNWAHFPHIHFGLMLEANNQTKLHDASEKHIMSRTALFNK	186
		>Gh_D05G3293	MSSLNNSAPEQLCYIPCNLCNIILAVNVPCSCLFETVTVRCGQCTNLCSINMAASFQSRGGKEIQVPNYTSSEYRIELGSSSSKGKNKLPKRPRIMNTTTQERVVNRPPDKRHRAPSLYNQFIKEEIQRIKLNNPDISHREAFSTAAKNWARFPHIHFGLMLETATQPKLNDDSTEHFQQLLK	183
		>Gh_D06G0514	MSSCIEVVSEQLCYIPCNFCNIVLAVSVPCSSLFDIVTVRCGHCTNLWSVNMAAAASQSLSWQDIQAPNNAIEDYRRDLGSSSKCSHNKLSMRPPLPNNATEERVVNRPPEKRQRVPSAYNRFIKYDILNTINLYGRLNIQRIKANNPDISHREAFSTAAKNWAHFPHIHFGLMLETNNQTKMNNVSG	188
		>Gh_D07G0365	MSTCTNLAPEQLCYIPCNFCNIVLAVSVPCSSLFDSVTVRCGHCTNLWSVNMAAAFQSLSWQDAQGASYATQDYRTDQGSSSKCNTKFSMRAPSKNATEERVVNRPPEKRQRVPSAYNQFIKEEIQRIKANNPDISHREAFSTAAKNWAHFPHIHFGLMLENQKSN	166
		>Gh_D07G1125	MSMDLTSERVWYVHCNFCNTILAVSVPCNSAFNIVTVRCGHCANLLSVNMGTSLQTVPSQDAQKQQITIDEDHSNKECGSSSKCNKFSAVDSTEQEATRMPPIRPPEKRQRVPSAYNRFIKEEIQRIKASNPDISHREAFSTAAKNWAHFPHIHFGLKLDGSKQAKLDQGYADQGSQKSNGYC	183
		>Gh_D07G1471	MSSSSAAFSPDHVSPSDQLCYVHCNFCDTVLAVSVPCTSLFKTVTVRCGHCTNLLSVNMLGLLLPSTNQHHVGHSFFTPHNLLEEIRSSATTNMVINQPNPNNSLMPPIHGGVEDIPKPPVVNRPPEKRQRVPSAYNRFIKDEIQRIKAGNPDISHREAFSAAAKNWAHFPLIHFGLMPDQPVKKTNVHQQEGEEMVMKDGFFAPNNVGVTPYQTSPNYC	220
		>Gh_D11G0842	MSSSSVSFSSDHLSPPDQLCYVHCNFCDTVLAVSVPCSSLFNNTVMVRCGHCTNLLSVDMRGLLLPTANQLHLAHSFFTPQNLLEEIRSCGPPNMVMINHPNPNDTVIRGAAELEEIAKPPVVNRPPEKRQRVPSAYNRFIKEEIQRIKAGNPDISHRDAFSAAAKNWAHFPRIHFGQMPDQAVMKMKNNVRQQEGEEAVVKDGFFVPTNVGVSPY	216
		>Gh_D12G2170	MSSSSTLSLDHLPPSEQLCYVHCNICDTVLAVSVPCTSLFKTVTVRCGHCTNLLPVNMRGLLMPSANQFHLPHNFFTPSHNLLEEISNPSPNILLNQGNTSDITLPTRGVADELPRPPVINRPPEKRQRVPSAYNRFIKDEIQRIKAGNPDITHREAFSAAAKNWAHFPHIHFGLMPDQPAKRTNVRQQEGEDVLMKDGFFASANVGVTPY	211
Fragaria vesca	5	>mrna03938.1-v1.0-hybrid	MSAAASSNTVFSPPDHLSPSDQLCYVHCNFCDTVLAVSVPCSSLFKTVTVRCGHCSNLLSVNMRGLLLPAAANLGHSFFTPQNLLQEEIRNAPSNTFTNQPNMMMNESFMPMIRGVEEIPKPPPVVNRPPEKRQRVPSAYNRFIKEEIQRIKAGNPDISHREAFSAAAKNWAHFPHIHFGLMPDQPVKKANMRQDGEDMLIKDNGFFNAAANLGVSPY	218
		>mrna04566.1-v1.0-hybrid	MNLEDKVPMDLVQPSEHLCYVRCNFCNTVLAVGLPFKRMMDTVTVKCGHCSNLSFLTTRPNNPIQIQPAPHQCQINDYPTTLTLHQSYSTDSRRGGHSSSSSSPTSLESPSSPKAPFVCKPPEKKHRVPSAYNRFMKEEIQRIKAANPEIPHREAFSAAAKNWARYPSSSGEAAATASGSSKKLKEMKNEDQTRFLFWISLSDRPVWQQFLICSSGFFFGYLVNGICEEYVYNRLQ	236
		>mrna22887.1-v1.0-hybrid	MGGFNGFRSGLVAFVLSFIIDRPYLASPCPPSWRLLMSDPMQVSVPAFNGPLTAATTTVVTVRCGHCANLLSVNIGAASLQYHSITPSATAAAAAASPHPHPHTQHYHSHPNIFTHQKQHQVSSEDSSSNKDYGSSSSSSTSSKCNKFAAAPAFDQSSTTVDQPRISPIRPPEKRQRVPSAYNRFIKEEIQRIKASNPDISHREAFSTAAKNIPLDSSSMFRPAQPSTTEAMVIFSWMRATPQAVDSSCFNSGRSLLMFGLWMMEIWLFHIPFRSSFRLIRVIPAASVPNITTTTETETIRVYKKQQNETFK	312
		>mrna31056.1-v1.0-hybrid	MSSCIDAVPEQLCYIPCNFCNIVLAVSVPCSSLLDIVTVRCGHCTNLWSVNMAAAFQSLSWQDVQAQHNHNAQNYRIDSGSSSKGNKKIATRDSIADHRATEERVNRPPEKRQRVPSAYNQFIKEEIQRIKANNPDISHREAFSTAAKNWAHFPHIHFGLMLETNNQAKLDNVVPVTSYA	180
		>mrna32251.1-v1.0-hybrid	MSSSNSASSTLSLDHLAPSEQLCYVHCNICDTVLAVSVPCTSLFKTVTVRCGHCTNLLPVNMRGLLLPSPNQFHHLGHSFFSQPNSHNLLDQEIPLMNPTPNFLMNNQTSSLNDFAVRPRGGVADELPRPPVINRPPEKRQRVPSAYNRFIKDEIQRIKSVNPDISHREAFSAAAKNWAHFPHIHFGLMPDQNTSTVKKTNVRQQESAEDVLMKDHNGFFAAANNNVRVSPY	232
Arabidopsis thaliana	6	>AtCRC	MNLEEKPTMTASRASPQAEHLYYVRCSICNTILAVGIPLKRMLDTVTVKCGHCGNLSFLTTTPPLQGHVSLTLQMQSFGGSDYKKGSSSSSSSSTSSDQPPSPSPPFVVKPPEKKQRLPSAYNRFMRDEIQRIKSANPEIPHREAFSAAAKNWAKYIPNSPTSITSGGHNMIHGLGFGEKK	181
		>AtINO	MTKLPNMTTTLNHLFDLPGQICHVQCGFCTTILLVSVPFTSLSMVVTVRCGHCTSLLSVNLMKASFIPLHLLASLSHLDETGKEEVAATDGVEEEAWKVNQEKENSPTTLVSSSDNEDEDVSRVYQVVNKPPEKRQRAPSAYNCFIKEEIRRLKAQNPSMAHKEAFSLAAKNWAHFPPAHNKRAASDQCFCEEDNNAILPCNVFEDHEESNNGFRERKAQRHSIWGKSPFE	231
		>AtYAB2	MSVDFSSERVCYVHCSFCTTILAVSVPYASLFTLVTVRCGHCTNLLSLNIGVSLHQTSAPPIHQDLQPHRQHTTSLVTRKDCASSSRSTNNLSENIDREAPRMPPIRPPEKRQRVPSAYNRFIKEEIQRIKACNPEISHREAFSTAAKNWAHFPHIHFGLKLDGNKKGKQLDQSVAGQKSNGYY	184
		>AtYAB5	MANSVMATEQLCYIPCNFCNIILAVNVPCSSLFDIVTVRCGHCTNLWSVNMAAALQSLSRPNFQATNYAVPEYGSSSRSHTKIPSRISTRTITEQRIVNRPPEKRQRVPSAYNQFIKEEIQRIKANNPDISHREAFSTAAKNWAHFPHIHFGLMLESNKQAKIA	164
		>AtFIL	MSMSSMSSPSSAVCSPDHFSPSDHLCYVQCNFCQTILAVNVPYTSLFKTVTVRCGCCTNLLSVNMRSYVLPASNQLQLQLGPHSYFNPQDILEELRDAPSNMNMMMMNQHPTMNDIPSFMDLHQQHEIPKAPPVNRPPEKRQRVPSAYNRFIKEEIQRIKAGNPDISHREAFSAAAKNWAHFPHIHFGLVPDNQPVKKTNMPQQEGEDNMVMKEGFYAPAAANVGVTPY	229
		>AtYAB3	MSSMSMSSSSAPAFPPDHFSSTDQLCYVHCSFCDTVLAVSVPPSSLFKTVTVRCGHCSNLLSVTVSMRALLLPSVSNLGHSFLPPPPPPPPPNLLEEMRSGGQNINMNMMMSHHASAHHPNEHLVMATRNGRSVDHLQEMPRPPPANRPPEKRQRVPSAYNRFIKEEIQRIKAGNPDISHREAFSAAAKNWAHFPHIHFGLMADHPPTKKANVRQQEGEDGMMGREGFYGSAANVGVAHN	240
Morus notabilis	6	>L484_026456	MNLEEKVAVDFVPPSTDHLCYVRCNFCSTVLAVALPYKRLLDTVTVKCGHCSNLSFLSTRPPLQPAHQFLDHPNLSLPGFCNEFRKGHYSSSSSSSSSISSEPISPKAPFVLKPPEKKHRLPSAYNRFMKEEIQRIKAANPEIPHREAFSAAAKNINIDPFRLSFCENEVGYYLVHVICPKIPCMFISDI	190
		>L484_020870	MSASSAAFSPDHLSPSDQLCYVHCNFCDTVLAVSVPSGSLFKTVTVRCGHCTNLLSVNMRGLLLPSASNQLHQYFGHSLFSPQQYLLEDMMMRSPPASNAMVNHQPNPNHDLVIPSRRRAAEQEIPKPPVVNRPPEKRQRVPSAYNRFIKDEIQRIKAGNPDISHREAFSAAAKNWAHFPHIHLGLMPDQPVKKANLRQPEADNMLMKDGFFSTTPAANVGVSPY	225
		>L484_019011	MSSSSASTLSLDHLPPSEQLCYVHCNICDTVLAVSVPCTSLFKTVTVRCGHCTNLLPVNMRGLLLPSANQFHLGHSFFTPSHHNLLEEIPNPTPNFLMNQTNMTDFAVPPRGVAHDHELSRPPVINRPPEKRQRVPSAYNRFIKDEIQRIKSVNPDISHREAFSAAAKNWAHFPHIHFGLMPDQSANKKTNVRQEGEDVLMKDAGFFASANHVGVAPY	218
		>L484_012344	MSSCVDVAPEQLCYIPCNFCNIVLAVSVPCSSLLDIVTVRCGHCTNLWSVNMAAAFQSLSWQQDHHHHLQAQNYNYNVPDYRIDSGSSSRCNVNKLAMRAPNANNVSEERVVNRPPEKRQRVPSAYNQFIKEEIQRIKANNPEISHREAFSTAAKNWAHFPHIHFGLMLKTNNQTKLDNGSEKHLMPSRAANALM	195
		>L484_027747	MSALNHLLDLSAEQICYVQCGFCTTILLVSVPCSSLSMVVTVRCGHCTGLLSVNMTKASFIPLHLLASFTQDEQKEEVDLEEVDTQNATDIRSPVVSSDNEEVDVVSVNQIVNKPPEKRKRAPSAYNRFIREEIKRLKDENPNMAHKEAFSTAAKNWANFPPTEYKEDEESCSQGKENVTLDSHVNKHHGAEFLALRRYCVKIMGVAALSWAPKR	215
		>L484_017140	MSLDMMASERVCYVHCNFCNTILAVSVPCSSLFTIVTVRCGHCGNLLSVNMEAASLQTVPPQDPQKQISSSENPVKEYGSSSKCNKHANLLESVDHEQPARSSPIRPPEKRQRVPSAYNRFIKEEIQRIKASNPDISHREAFSTAAKNWAHFPHIHFGLKLDGTKNKQAKLDQTIPGDHQGTHQAANGFH	190

## Sheet: Table S2
Table S2 Sequence information of BpYAB family in paper mulberry
Gene Name	Gene ID	gDNA sequence	gDNA length	CDs sequence	CDs length	animo acid sequence	AA Length
BpYAB1	Bp0940004.1	ATGAACATGGAGGAGAAAGTCACCGTCGATTTTGTCCCGCCGTCGACGGATCACCTCTGCTACGTCCGGTGCAACTTCTGCAGCACCGTTCTCGCGGTAAAACTTATTTAACATCATACTTATTTATATACAATTGCATGTTTAATGCATCTTGCATTTATATATATATATATATTTTTTTTTTTTTTTTTGTTCAAGTACTAATAGTACTTTTTCAAGATCACTAATCCAAATCTCTGATGGTGATCGTATATGGTTACTAGTTAGCATATATATTTGTATCTGTGGTTACATATAATATATTTTATTGAATTAAAGAAAGAATTACTGCATATTTACTGCAGAAGACTTGATCGTACGTGATTATATATATGTGAACAACGTAATTTATGATTAATA…	2230	ATGAACATGGAGGAGAAAGTCACCGTCGATTTTGTCCCGCCGTCGACGGATCACCTCTGCTACGTCCGGTGCAACTTCTGCAGCACCGTTCTCGCGGTTGCGCTTCCATACAAGCGACTGCTGGACACGGTGACGGTAAAATGTGGTCACTGCAGTAACCTCTCATTTCTCAGCACCAGACCTCCTCTCCAACCTGCTCATCAATTTCTTGATCACCCTTTGAGTCTTCCGGGATTTTGCAATGAGTTCAGAAAGGGTCATTACTCATGCTCATCATCTTCCTCGTCAAGTACATCTAGCGAGCCGATGTCCCCCAAGGCACCCTTCGTCGTTAAGCCGCCTGAAAAGAAGCATAGGCTACCATCTGCTTACAATCGATTCATGAAAGAGGAGATACAG…	543	MNMEEKVTVDFVPPSTDHLCYVRCNFCSTVLAVALPYKRLLDTVTVKCGHCSNLSFLSTRPPLQPAHQFLDHPLSLPGFCNEFRKGHYSCSSSSSSSTSSEPMSPKAPFVVKPPEKKHRLPSAYNRFMKEEIQRIKAANPEIPHREAFSAAAKNWARYIPNPPAASVSGGNKRVQQGLQE	180
BpYAB2	Bp09g0299.1	ATGTCACTGGACTTGATGGCCTCCGAACGTGTTTGTTATGTTCACTGCAACTTCTGCAACACCGTCTTAGCGGTACAATTAAACCCTTTTTCTACAAAATTACAAGTTCCCCTTATCATTATTTTCCTTCTTCTTTCTCTTTTCTTTTTCATATTTTATAATCTTTTTATAAGGAATTTTCTTGCCTTTTACCAGCTTCTGAATTTGACCCCCATTTGCTTTCCTATAGATTATTAGCTTTTAATGCTTGGATCATCAATTAATTCTCGGTTCGTGGAAGCAAGATCGATTTGGTTTTGTTTGGGCATAAATATTAGCCAATATCCAAAATGCCCACTTCATTTTGAGTGAATTTAGTAGAATTCACAACAATTCGATCCTCTTTTTCTCTTTTGATTT…	6482	ATGTCACTGGACTTGATGGCCTCCGAACGTGTTTGTTATGTTCACTGCAACTTCTGCAACACCGTCTTAGCGGTTAGTGTTCCATGCAGCAGCTTATTTACAATAGTGACGGTTAGATGCGGGCATTGTGGAAATCTGCTGTCCGTTAACATGGGAGCAGCTTCACTTCAAACGGTTCCTCCTCAAGACCCCCAGTTGCAGAAACAGATTCCAAGCTCAGAAGATCCAGGTAAGGAGTATGGATCATCTTCCAAGTGCAACAAGCATGCTTCATTGGAATCTCTCGAGCACGAACAACCTGCTAGGTCGCCTCCGATTCGCCCCCCGGAGAAGAGGCAACGAGTTCCCTCGGCATATAACAGGTTTATTAAGGAGGAAATCCAAAGGATTAAAGCTAGT…	573	MSLDLMASERVCYVHCNFCNTVLAVSVPCSSLFTIVTVRCGHCGNLLSVNMGAASLQTVPPQDPQLQKQIPSSEDPGKEYGSSSKCNKHASLESLEHEQPARSPPIRPPEKRQRVPSAYNRFIKEEIQRIKASNPDISHREAFSTAAKNWAHFPHIHFGLKLDGSKNKQAKLDQTMAGDHHGTQTTNGFY	190
BpYAB3	Bp06g0033.1	ATGTCATCCTCTTCTGCTTCAACACTGTCGCTGGACCACCTCCCTCCTTCCGAGCAGCTCTGTTATGTCCATTGCAACATTTGCGACACTGTCCTTGCGGTATATCATTTCATCCTTTCATTGTTACCACTCAAAGGCTCTTTTCTTTGTTTTATTTTTTGATTTTTTTCTAGGGTTCATATGTAATATACTTTCTTTGTCAAACATGATTCATGTTTGCTGATGATTATTTTTTTGGTCATATAGGTGAGTGTTCCTTGCACCAGCTTGTTCAAGACAGTCACGGTTAGATGTGGCCACTGCACCAACCTGCTGCCTGTGAACATGCGTGGTTTGCTTCTGCCTTCGACTAATCAGTTTCATCTGGGCCACTCTTTCTTCACTGCTCCTCATCATAAT…	2537	ATGTCATCCTCTTCTGCTTCAACACTGTCGCTGGACCACCTCCCTCCTTCCGAGCAGCTCTGTTATGTCCATTGCAACATTTGCGACACTGTCCTTGCGGTGAGTGTTCCTTGCACCAGCTTGTTCAAGACAGTCACGGTTAGATGTGGCCACTGCACCAACCTGCTGCCTGTGAACATGCGTGGTTTGCTTCTGCCTTCGACTAATCAGTTTCATCTGGGCCACTCTTTCTTCACTGCTCCTCATCATAATCTTCTGGAAGAGATACCAAACCCAGCACCAAACTTCCTGATGAACCAAACAAGCATGACTGACTTTGCTGTGCCGCCTAGAGGAGTAGCTCATGATCATCATGAACTTTCAAGGCCACCAGTTATCAACAGACCCCCGGAGAAGAGA…	669	MSSSSASTLSLDHLPPSEQLCYVHCNICDTVLAVSVPCTSLFKTVTVRCGHCTNLLPVNMRGLLLPSTNQFHLGHSFFTAPHHNLLEEIPNPAPNFLMNQTSMTDFAVPPRGVAHDHHELSRPPVINRPPEKRQRVPSAYNRFIKDEIQRIKSVNPDISHREAFSAAAKNWAHFPHIHFGLMPDQTAANKKTNVRQEAGEDVLMKDAGFFASAANHVGVGPY	222
BpYAB4	Bp01g1037.1	ATGTCCGCCTCGTCCGCTGCCTTTTCACCGGACCGCCTCTCTCCCTCCGACCAGCTCTGCTACGTCCATTGCAACTTCTGCGACACTGTCCTCGCGGTGTGCCCTTATATATTCATCTCAGATTTATAATATATATATGTCATGATCTATAAATATATAGATATTATATCTTGTTATTTCGTTTCTGTCTCTGATCCGTTTTTTTGGTGTTTTAGGTAAGTGTTCCTTCAGGTAGTTTGTTCAAGACCGTCACGGTTCGATGCGGTCACTGCACAAACCTTCTCTCTGTGAACATGAGAGGACTGCTTCTTCCTGCCTCTGGCCCCAACCAGCTTCAGTACTTAGGACATTCTTTCTTCTCTCCACAACAATATCTTCTGGTATATATACATTATATAT…	2788	ATGTCCGCCTCGTCCGCTGCCTTTTCACCGGACCGCCTCTCTCCCTCCGACCAGCTCTGCTACGTCCATTGCAACTTCTGCGACACTGTCCTCGCGGTAAGTGTTCCTTCAGGTAGTTTGTTCAAGACCGTCACGGTTCGATGCGGTCACTGCACAAACCTTCTCTCTGTGAACATGAGAGGACTGCTTCTTCCTGCCTCTGGCCCCAACCAGCTTCAGTACTTAGGACATTCTTTCTTCTCTCCACAACAATATCTTCTGGAGGACCTGATGATGCGAAGCCCACCCGCGCCACCGTCAAATGTGATGATGAATCAGACAAACCCTAATCATGATTTGGTCATGATTCCAACCCGCGGAAGATCGGCTGCTGAGGAGATCCCTAAGCCTCCTGTTGTT…	681	MSASSAAFSPDRLSPSDQLCYVHCNFCDTVLAVSVPSGSLFKTVTVRCGHCTNLLSVNMRGLLLPASGPNQLQYLGHSFFSPQQYLLEDLMMRSPPAPPSNVMMNQTNPNHDLVMIPTRGRSAAEEIPKPPVVNRPPEKRQRVPSAYNRFIKDEIQRIKAGNPDISHREAFSAAAKNWAHFPHIHLGLMPDHQPVKKANMRQQEADNMLMKDGFFSAPANVGVSPY	226
BpYAB5	Bp1460001.1	ATGTCGAGCTGCGTCGATGTTGCGCCTGAGCAACTCTGCTACATCCCCTGCAACTTTTGCAATATTGTTCTCGCGGTATCTCTGATCTCAACAACTTCTCTTTTTCAAGGGTTAATGGGGAAAGATCTGCTTTTTCAGCTCTTATATATCATCACACTTCTGAACCCTATATGTATACACACACATATACATACATATATATCTATATATGTACTCATTTCTTTTTCTTTTTTTTTTTTTTTTTTTCCTTGATTATTTTTGGGGGTGTTTTTCTGATGTGTGTTTTAGAAAAGGAATTGTAATAATTTAGATCCTGAAAAAGCTAGCCTTCCTCTCTTCTATATTATCATGATATGTGATGATCATGTTTTGTTGTTATTTCAATTTATTCTGATGAAA…	3958	ATGTCGAGCTGCGTCGATGTTGCGCCTGAGCAACTCTGCTACATCCCCTGCAACTTTTGCAATATTGTTCTCGCGGTGAGTGTTCCATGCAGCAGCCTGTTCGACATCGTGACCGTCCGATGCGGGCACTGCACCAATCTATGGTCCGTCAACATGGCCGCCGCGTTTCAGTCCCTGTCGTGGCAACAAGATCATCACCATCTGCAGGCACAAAATTACAACTGCAATGTACCTGATTATCGCATCGATTCGGGCTCTTCATCAAGGTGCAACCTTAACAAGCTTGCAGTGAGAGCTCCTAATGGTAATCATGTTGCTGAGGAAAGGGTTGTGAACCGACCTCCCGAGAAGAGGCAGCGAGTCCCGTCTGCATATAACCAGTTTATAAAGGAGGAGATT…	585	MSSCVDVAPEQLCYIPCNFCNIVLAVSVPCSSLFDIVTVRCGHCTNLWSVNMAAAFQSLSWQQDHHHLQAQNYNCNVPDYRIDSGSSSRCNLNKLAVRAPNGNHVAEERVVNRPPEKRQRVPSAYNQFIKEEIQRIKANNPDISHREAFSTAAKNWAHFPHIHFGLMLKTNNQTKLDNGSEKHLMPSRAALLNK	194
BpYAB6	Bp07g0370.1	ATGTCGGCACTGAACCGTCTTCTTGATCTCTCTGAACAGATTTGTTATGTGCAATGTGGTTTCTGCACCACTATTTTACTGGTATGTTACGAAAATTCTAGCAAAAACAATCTAGCATAAACTTAAATATTAAATACGTTAATCTGTTGTTTCTCTGTGGTTTAACTTCTTGGCCTTTTAATATGACATTATATATAAATATATATATATATATATATATATGTGTGTGTGTGTATGTATTTGTACATGAGAATGTAGGTAAGCGTCCCATGCAGCAGCATGTCAATGGTGGTGACGGTCAGATGTGGGCACTGCACCGCTCTGCTTTCTGTCAACATGATGAAAGCCTCCTTTGTTCCACTGCATCTCTTAGCTGATTCCCTTACACAAGATGAGGTT…	1197	ATGTCGGCACTGAACCGTCTTCTTGATCTCTCTGAACAGATTTGTTATGTGCAATGTGGTTTCTGCACCACTATTTTACTGGTAAGCGTCCCATGCAGCAGCATGTCAATGGTGGTGACGGTCAGATGTGGGCACTGCACCGCTCTGCTTTCTGTCAACATGATGAAAGCCTCCTTTGTTCCACTGCATCTCTTAGCTGATTCCCTTACACAAGATGAGCAAAAGGAAGAGGAAGATTTGGAGGAAGTGGAAACACAAAACGAGATCGATATTCACAACCACCCTGTGGTTTCTTCTGACAATGAAGATGGAGATATAATCTCCGACAATCAGATTGTTAACAAACCTCCAGAGAAGAGACAACGAGCTCCGTCGGCTTACAACCAATTCATAAGAGAA…	540	MSALNRLLDLSEQICYVQCGFCTTILLVSVPCSSMSMVVTVRCGHCTALLSVNMMKASFVPLHLLADSLTQDEQKEEEDLEEVETQNEIDIHNHPVVSSDNEDGDIISDNQIVNKPPEKRQRAPSAYNQFIREEIKRLKAENPNMAHKEAFSTASKNWAHFPPIEYKEDEEAAARGRKM	179

## Sheet: Table S3
Table S3 The length of exons from BpYAB genomic sequences
Gene Name	CDs (bp)	Exon 1 (bp)	Exon 2 (bp)	Exon 3 (bp)	Exon 4 (bp)	Exon 5 (bp)	Exon 6 (bp)	Exon 7 (bp)
BpYAB1	543	96	135	106	49	76	57	24
BpYAB2	573	72	123	127	49	76	126	0
BpYAB3	666	99	159	127	49	76	78	81
BpYAB4	678	96	165	145	49	76	78	72
BpYAB5	585	75	132	133	49	76	69	51
BpYAB6	540	81	138	127	49	76	69	0

## Sheet: Table S4
Table S4 The sequence and function of predicted cis-elements in BpYABs
Promoter of BpYAB1		Promoter of BpYAB2		Promoter of BpYAB3		Promoter of BpYAB4		Promoter of BpYAB5		Promoter of BpYAB6
Name of Cis-element	Numer	Name of Cis-element	Numer	Name of Cis-element	Numer	Name of Cis-element	Numer	Name of Cis-element	Numer	Name of Cis-element	Numer
10PEHVPSBD	2	-10PEHVPSBD	1	-10PEHVPSBD	2	-10PEHVPSBD	1	2SSEEDPROTBANAPA	1	-10PEHVPSBD	1
-300ELEMENT	1	-300ELEMENT	2	2SSEEDPROTBANAPA	1	2SSEEDPROTBANAPA	1	-300ELEMENT	1	2SSEEDPROTBANAPA	2
-300ELEMENT	4	AACACOREOSGLUB1	1	-300ELEMENT	6	-300ELEMENT	4	AACACOREOSGLUB1	3	-300ELEMENT	2
ABREATRD22	1	AGMOTIFNTMYB2	1	AACACOREOSGLUB1	2	AACACOREOSGLUB1	2	AGL2ATCONSENSUS	1	AACACOREOSGLUB1	1
ABRELATERD1	4	ANAERO1CONSENSUS	3	ABRELATERD1	1	ABRELATERD1	3	AMMORESIVDCRNIA1	1	AMYBOX1	1
ABRERATCAL	2	ARFAT	2	ACGTATERD1	4	ABRERATCAL	1	AMYBOX1	1	ANAERO1CONSENSUS	7
ACGTABOX	2	ARR1AT	24	AGMOTIFNTMYB2	2	ACGTATERD1	8	ANAERO1CONSENSUS	2	ARFAT	1
ACGTATERD1	16	BIHD1OS	5	ANAERO1CONSENSUS	4	AGCBOXNPGLB	1	ARFAT	2	ARR1AT	18
ACGTOSGLUB1	1	BOXCPSAS1	1	ARFAT	1	AMYBOX2	1	ARR1AT	21	ATHB1ATCONSENSUS	2
ACGTTBOX	4	BOXIINTPATPB	2	ARR1AT	20	ANAERO1CONSENSUS	1	BIHD1OS	3	ATHB5ATCORE	2
ARFAT	1	CAATBOX1	25	BIHD1OS	3	ANAERO2CONSENSUS	2	BOXIINTPATPB	7	AUXREPSIAA4	1
ARR1AT	11	CACTFTPPCA1	22	BOXIINTPATPB	1	ARR1AT	25	CAATBOX1	19	BIHD1OS	5
ATHB6COREAT	1	CATATGGMSAUR	4	CAATBOX1	28	ASF1MOTIFCAMV	1	CACTFTPPCA1	19	BOXCPSAS1	1
BIHD1OS	4	CCAATBOX1	3	CACTFTPPCA1	30	BOXCPSAS1	1	CANBNNAPA	1	BOXIINTPATPB	1
BOXIINTPATPB	2	CIACADIANLELHC	2	CANBNNAPA	2	BOXIINTPATPB	1	CARGCW8GAT	8	BOXLCOREDCPAL	1
BOXLCOREDCPAL	1	CTRMCAMV35S	20	CAREOSREP1	4	BOXLCOREDCPAL	1	CCAATBOX1	7	CAATBOX1	23
CAATBOX1	23	CURECORECR	4	CATATGGMSAUR	2	BS1EGCCR	2	CGCGBOXAT	2	CACTFTPPCA1	41
CACGTGMOTIF	2	DOFCOREZM	20	CCA1ATLHCB1	1	CAATBOX1	25	CIACADIANLELHC	1	CANBNNAPA	2
CACTFTPPCA1	42	DPBFCOREDCDC3	1	CCAATBOX1	6	CACTFTPPCA1	26	CTRMCAMV35S	13	CARGCW8GAT	2
CARGCW8GAT	6	EBOXBNNAPA	16	CIACADIANLELHC	1	CANBNNAPA	1	CURECORECR	8	CBFHV	1
CBFHV	2	EECCRCAH1	1	CPBCSPOR	1	CAREOSREP1	1	DOFCOREZM	48	CCAATBOX1	7
CCA1ATLHCB1	1	ELRECOREPCRP1	1	CTRMCAMV35S	5	CARGCW8GAT	4	DPBFCOREDCDC3	1	CIACADIANLELHC	2
CCAATBOX1	4	GAGA8HVBKN3	13	CURECORECR	14	CBFHV	1	E2FCONSENSUS	2	CPBCSPOR	1
CEREGLUBOX3PSLEGA	1	GAGAGMGSA1	11	DOFCOREZM	39	CCAATBOX1	5	EBOXBNNAPA	10	CTRMCAMV35S	1
CGACGOSAMY3	1	GATABOX	10	DPBFCOREDCDC3	2	CGACGOSAMY3	2	EECCRCAH1	3	CURECORECR	8
CIACADIANLELHC	3	GT1CONSENSUS	17	EBOXBNNAPA	14	CIACADIANLELHC	3	GAGA8HVBKN3	4	DOFCOREZM	35
CPBCSPOR	1	GT1CORE	3	EECCRCAH1	2	CPBCSPOR	1	GAGAGMGSA1	3	DPBFCOREDCDC3	2
CTRMCAMV35S	22	GT1GMSCAM4	5	GAGA8HVBKN3	2	CTRMCAMV35S	3	GAREAT	1	E2FCONSENSUS	1
CURECORECR	22	GTGANTG10	6	GAGAGMGSA1	1	CURECORECR	14	GATABOX	15	EBOXBNNAPA	22
DOFCOREZM	27	IBOXCORE	1	GAREAT	1	DOFCOREZM	24	GT1CONSENSUS	23	GAREAT	1
DPBFCOREDCDC3	5	INRNTPSADB	10	GATABOX	18	DPBFCOREDCDC3	1	GT1CORE	1	GATABOX	21
DRE2COREZMRAB17	1	INTRONLOWER	1	GCCCORE	1	DRE1COREZMRAB17	1	GT1GMSCAM4	10	GT1CONSENSUS	25
DRECRTCOREAT	2	LECPLEACS2	1	GT1CONSENSUS	17	DRECRTCOREAT	1	GTGANTG10	6	GT1CORE	1
EBOXBNNAPA	8	LTRE1HVBLT49	1	GT1GMSCAM4	5	E2FCONSENSUS	1	HDZIP2ATATHB2	1	GT1GMSCAM4	7
EECCRCAH1	2	LTRECOREATCOR15	1	GTGANTG10	14	EBOXBNNAPA	10	IBOX	1	GTGANTG10	17
GAGA8HVBKN3	17	MARARS	1	HBOXCONSENSUSPVCHS	1	EECCRCAH1	5	IBOXCORE	6	IBOX	2
GAGAGMGSA1	16	MARTBOX	8	HBOXPVCHS15	1	GATABOX	15	INRNTPSADB	4	IBOXCORE	9
GATABOX	18	MYB1AT	10	IBOXCORE	5	GCCCORE	2	INTRONLOWER	1	INRNTPSADB	8
GT1CONSENSUS	18	MYB2CONSENSUSAT	1	INRNTPSADB	6	GT1CONSENSUS	28	LEAFYATAG	1	INTRONLOWER	1
GT1CORE	1	MYBCORE	2	INTRONLOWER	1	GT1CORE	1	LTRECOREATCOR15	1	L1BOXATPDF1	1
GT1GMSCAM4	5	MYBCOREATCYCB1	5	L1BOXATPDF1	2	GT1GMSCAM4	8	MARABOX1	1	MARTBOX	11
GTGANTG10	13	MYBPLANT	1	LTRECOREATCOR15	1	GT1MOTIFPSRBCS	1	MARARS	1	MYB1AT	7
IBOX	2	MYBPZM	3	MARABOX1	1	GTGANTG10	16	MARTBOX	6	MYB2CONSENSUSAT	2
IBOXCORE	7	MYBST1	3	MARTBOX	18	HDZIP2ATATHB2	1	MYB1AT	5	MYBATRD22	1
INRNTPSADB	2	MYCATERD1	1	MYB1AT	1	HEXAMERATH4	2	MYB2AT	1	MYBCORE	2
LECPLEACS2	1	MYCATRD22	1	MYBCORE	1	IBOXCORE	7	MYB2CONSENSUSAT	1	MYBCOREATCYCB1	2
LTRECOREATCOR15	2	MYCCONSENSUSAT	16	MYBCOREATCYCB1	2	INRNTPSADB	4	MYBCORE	6	MYBGAHV	1
MARARS	1	NODCON1GM	2	MYBPZM	2	LECPLEACS2	2	MYBCOREATCYCB1	1	MYBPZM	1
MARTBOX	3	NODCON2GM	7	MYBST1	2	LTRECOREATCOR15	1	MYBGAHV	1	MYBST1	7
MYB1AT	4	NTBBF1ARROLB	2	MYCATERD1	4	MARTBOX	13	MYBPLANT	1	MYCATERD1	3
MYB2CONSENSUSAT	1	OSE1ROOTNODULE	2	MYCATRD22	4	MYB1AT	3	MYBPZM	1	MYCATRD22	3
MYBCORE	2	OSE2ROOTNODULE	7	MYCCONSENSUSAT	14	MYB2AT	3	MYBST1	1	MYCCONSENSUSAT	22
MYBCOREATCYCB1	1	POLASIG1	6	NODCON2GM	8	MYB2CONSENSUSAT	5	MYCCONSENSUSAT	10	NODCON1GM	1
MYBST1	3	POLASIG2	1	NTBBF1ARROLB	3	MYBCORE	8	NODCON1GM	3	NODCON2GM	8
MYCATERD1	2	POLASIG3	7	OSE2ROOTNODULE	8	MYBCOREATCYCB1	2	NODCON2GM	13	NTBBF1ARROLB	3
MYCATRD22	2	POLLEN1LELAT52	12	P1BS	2	MYBST1	4	NTBBF1ARROLB	2	OSE1ROOTNODULE	1
MYCCONSENSUSAT	8	PRECONSCRHSP70A	1	POLASIG1	11	MYCATERD1	3	OSE1ROOTNODULE	3	OSE2ROOTNODULE	8
NAPINMOTIFBN	2	PYRIMIDINEBOXOSRAMY1A	1	POLASIG2	3	MYCATRD22	3	OSE2ROOTNODULE	13	POLASIG1	3
NODCON1GM	4	RAV1AAT	6	POLASIG3	5	MYCCONSENSUSAT	10	POLASIG1	11	POLASIG3	2
NODCON2GM	2	RAV1BAT	1	POLLEN1LELAT52	14	NAPINMOTIFBN	1	POLASIG2	2	POLLEN1LELAT52	11
NTBBF1ARROLB	1	RBCSCONSENSUS	2	PREATPRODH	1	NODCON2GM	11	POLASIG3	3	PROXBBNNAPA	1
OSE1ROOTNODULE	4	REALPHALGLHCB21	2	PRECONSCRHSP70A	1	NTBBF1ARROLB	1	POLLEN1LELAT52	28	PYRIMIDINEBOXHVEPB1	1
OSE2ROOTNODULE	2	ROOTMOTIFTAPOX1	19	RAV1AAT	6	OSE2ROOTNODULE	11	PREATPRODH	2	PYRIMIDINEBOXOSRAMY1A	5
P1BS	2	S1FBOXSORPS1L21	1	RAV1BAT	1	PALBOXAPC	1	PRECONSCRHSP70A	1	RAV1AAT	3
POLASIG1	6	SEBFCONSSTPR10A	2	RBCSCONSENSUS	1	POLASIG1	1	PYRIMIDINEBOXHVEPB1	1	RBCSCONSENSUS	2
POLASIG2	1	SEF1MOTIF	1	REALPHALGLHCB21	1	POLASIG2	1	PYRIMIDINEBOXOSRAMY1A	3	REALPHALGLHCB21	1
POLASIG3	7	SEF3MOTIFGM	2	ROOTMOTIFTAPOX1	33	POLASIG3	4	RAV1AAT	7	RHERPATEXPA7	2
POLLEN1LELAT52	11	SEF4MOTIFGM7S	8	RYREPEATBNNAPA	8	POLLEN1LELAT52	12	RAV1BAT	2	ROOTMOTIFTAPOX1	13
PREATPRODH	3	SORLIP5AT	1	RYREPEATGMGY2	6	PREATPRODH	1	RBCSCONSENSUS	2	RYREPEATBNNAPA	2
PRECONSCRHSP70A	1	SP8BFIBSP8BIB	1	RYREPEATLEGUMINBOX	7	PROXBBNNAPA	1	REALPHALGLHCB21	4	RYREPEATGMGY2	2
PROLAMINBOXOSGLUB1	1	SREATMSD	1	RYREPEATVFLEB4	4	PYRIMIDINEBOXHVEPB1	3	RHERPATEXPA7	2	RYREPEATLEGUMINBOX	2
PYRIMIDINEBOXHVEPB1	1	SURECOREATSULTR11	2	S1FBOXSORPS1L21	4	PYRIMIDINEBOXOSRAMY1A	4	ROOTMOTIFTAPOX1	16	RYREPEATVFLEB4	2
PYRIMIDINEBOXOSRAMY1A	3	SV40COREENHAN	2	SEF1MOTIF	5	QELEMENTZMZM13	1	S1FBOXSORPS1L21	1	S1FBOXSORPS1L21	2
RAV1AAT	4	TAAAGSTKST1	4	SEF4MOTIFGM7S	3	RAV1AAT	6	SEBFCONSSTPR10A	1	SEBFCONSSTPR10A	1
RBCSCONSENSUS	1	TATABOX2	2	SITEIIATCYTC	1	RAV1BAT	1	SEF1MOTIF	1	SEF3MOTIFGM	2
REALPHALGLHCB21	2	TATABOX3	3	SORLIP1AT	1	RBCSCONSENSUS	1	SEF4MOTIFGM7S	11	SEF4MOTIFGM7S	3
REBETALGLHCB21	1	TATABOX4	1	SORLREP3AT	2	REALPHALGLHCB21	1	SORLIP1AT	1	SITEIIATCYTC	1
RHERPATEXPA7	3	TATABOX5	10	SREATMSD	1	RHERPATEXPA7	9	SORLIP2AT	1	SORLIP1AT	1
ROOTMOTIFTAPOX1	22	TATABOXOSPAL	3	SURECOREATSULTR11	4	ROOTMOTIFTAPOX1	17	SORLREP3AT	1	SORLIP2AT	1
RYREPEATBNNAPA	3	WBBOXPCWRKY1	1	TAAAGSTKST1	8	RYREPEATBNNAPA	3	SURECOREATSULTR11	2	SREATMSD	4
RYREPEATLEGUMINBOX	2	WBOXATNPR1	3	TATABOX2	4	RYREPEATLEGUMINBOX	1	TAAAGSTKST1	4	SURECOREATSULTR11	2
S1FBOXSORPS1L21	1	WBOXHVISO1	1	TATABOX3	2	S1FBOXSORPS1L21	1	TATABOX2	1	SV40COREENHAN	2
SEBFCONSSTPR10A	1	WBOXNTERF3	2	TATABOX4	4	S2FSORPL21	1	TATABOX3	2	TAAAGSTKST1	5
SEF1MOTIF	4	WRKY71OS	7	TATABOX5	6	SEF4MOTIFGM7S	3	TATABOX5	5	TATABOX2	2
SEF4MOTIFGM7S	3			TATABOXOSPAL	2	SITEIIATCYTC	1	TATABOXOSPAL	2	TATABOX3	1
SORLIP1AT	1			TATAPVTRNALEU	2	SORLIP1AT	2	TATCCAOSAMY	1	TATABOX4	4
SORLIP2AT	1		_________________________	TATCCAOSAMY	1	SORLIP2AT	1	TELOBOXATEEF1AA1	1	TATAPVTRNALEU	2
SORLIP5AT	2			TBOXATGAPB	1	SREATMSD	1	UP2ATMSD	1	TATCCAOSAMY	1
SORLREP3AT	3			WBOXATNPR1	1	T/GBOXATPIN2	1	WBBOXPCWRKY1	2	TBOXATGAPB	1
SREATMSD	2			WBOXHVISO1	3	TAAAGSTKST1	3	WBOXATNPR1	4	UP1ATMSD	1
SURECOREATSULTR11	3			WBOXNTERF3	3	TATABOX3	1	WBOXHVISO1	2	WBBOXPCWRKY1	2
TAAAGSTKST1	4			WRKY71OS	6	TATABOX5	6	WBOXNTERF3	3	WBOXATNPR1	4
TATABOX2	2					TATABOXOSPAL	1	WRKY71OS	6	WBOXHVISO1	7
TATABOX3	1					TATCCAOSAMY	1	XYLAT	1	WBOXNTCHN48	1
TATABOX4	9					TATCCAYMOTIFOSRAMY3D	1			WBOXNTERF3	7
TATABOX5	8					TELOBOXATEEF1AA1	1			WRKY71OS	12
TATABOXOSPAL	1					UP2ATMSD	1			WUSATAg	1
TATAPVTRNALEU	3					WBBOXPCWRKY1	1
TELOBOXATEEF1AA1	1					WBOXATNPR1	4
UP2ATMSD	1					WBOXHVISO1	5
WBBOXPCWRKY1	1					WBOXNTERF3	7
WBOXATNPR1	4					WRKY71OS	8
WBOXHVISO1	5
WBOXNTERF3	6
WRECSAA01	1
WRKY71OS	10
WUSATAg	1

## Sheet: Table S5
Table S5 The primers used in the qRT-PCR in the transgenic plants
Gene Name	Forward primer (5’-3’)	Reverse primer (5’-3’)
AtYAB2	ACAAGGAAAGATTGTGCATCGT	GTTGCCATCCAGCTTTAATCC
AtYAB3	GACTCGCAACGGAAGATCAGT	CTTCTTCGTGGGAGGATGGT
AtYAB5	CTGTAAACATGGCAGCTGCTCT	CGCCTTAATCCTCTGAATTTCC
AtFIL	ATTCCTAAAGCACCACCCGT	TCACCATGTTATCCTCTCCCTC
AtAS1	AAAGCGGTTAGGGAAGTGGT	CACTGGGTTAGGAGGCTGAAC
AtAS2	GGCTTGGATGTTCCGGCCGGTA	ATCACCAAGCGATCGACGAA
AtKAN1	TCCAAAGTCGGTTCTTGAGCT	CAACGAGGTTGTGTGGAAGAA
AtKAN2	ATGTTTCCCTTTCGACCCGT	CGAGTAATTCAACGGCGTGA
AtKAN3	GCTGTTCAATTATTGGGTGGTC	GCCTTTGCCTTCAACTGGAA
AtKAN4	AGAAAGAGGCAGAGCAGAGGA	CCCCAATGTGAAATCCAAATT
AtCUC1	TTCTTCTTCTGCCGTCACCG	TGCATCGAAATCAATCTGTCCC
AtCUC2	TAGCACCAACACAACCGTCA	GTCGATGCAGAAGACGATCC
AtPHB	GTCACCAATGGGTAGCGATG	CCCCAGCTCTAGCACAAGG
AtPHV	CATGTGGACTTGGATGTCTCAA	CTCCTCCATCACTACTCATTGGA
AtREV	GATTCACTTGGAAGCGACGA	TGAAGGCAAGCAAGCAAATC
AtLMI	TTACGGTCAATACAACAATCCG	AGACTCAATCTCGCATCCAAGA
AtPIN1	AAGTATTGGCAACGGACGG	CCATGCCTAGACCTGCATCT
AtWOX1	AGAAACGACGGCGACAAAT	AGCTTCGTCTCTCGTCTCCTC

## Sheet: Table S6
Table S6 The restriction enzymes and primers used to construct the recombinant expression vectors for subcellular localization
Gene Name	restriction enzymes	Forward primer (5’-3’)	restriction enzymes	Reverse primer (5’-3’)
BpYAB1	XbaⅠ	TGCTCTAGAATGAACATGGAGGAGAAAAT	SmaⅠ	TCCCCCGGGTTCTTGCAAAACCTGCTGAA
BpYAB2	XbaⅠ	TGCTCTAGAATGTCACTGGACTTGATGGC	SalⅠ	GACGTCGACGTAGAATCCATTGGTTGTTT
BpYAB3	SmaⅠ	AAAGAGCTCATGTCATCCTCTTCTGCTTC	SalⅠ	GACGTCGACGTAAGGTCCAACGCCAACAT
BpYAB4	XbaⅠ	TGCTCTAGAATGTCCGCCTCGTCCGCTGC	SalⅠ	GACGTCGACGTAGGGAGAGACTCCCACAT
BpYAB5	XbaⅠ	TGCTCTAGAATGTCGAGCTGCGTCGATGT	SalⅠ	GACGTCGACCTTATTTAGGAGTGCAGCTC
BpYAB6	XbaⅠ	TGCTCTAGAATGTCGGCACTGAACCGTCT	SalⅠ	GACGTCGACCATTTTTCTTCCCCTGGCTG

## Sheet: Table S7
Table S7 The restriction enzymes and primers used to construct the recombinant expression vectors for transactivation activity assay
Gene Name	restriction enzyme	Forward primer (5’-3’)	restriction enzyme	Reverse primer (5’-3’)
BpYAB1	EcoRⅠ	CCGGAATTCATGAACATGGAGGAGAAAAT	BamH Ⅰ	CGCGGATCCTTCATTCTTGCAAAACCTGC
BpYAB2	EcoRⅠ	CCGGAATTCATGTCACTGGACTTGATGGC	SalⅠ	GACGTCGACCTCAGTAGAATCCATTGGTTG
BpYAB3	EcoRⅠ	CCGGAATTCATGTCATCCTCTTCTGCTTC	SalⅠ	GACGTCGACACTAGTAAGGTCCAACGCCAA
BpYAB4	EcoRⅠ	CCGGAATTCATGTCCGCCTCGTCCGCTGC	SalⅠ	GACGTCGACATTAGTAGGGAGAGACTCCCA
BpYAB5	EcoRⅠ	CCGGAATTCATGTCGAGCTGCGTCGATGT	SalⅠ	GACGTCGACTTCACTTATTTAGGAGTGCAG
BpYAB6	EcoRⅠ	CCGGAATTCATGTCGGCACTGAACCGTCT	SalⅠ	GACGTCGACCTCACTGAAAGCTTTGCCCT

## Sheet: Table S8
Table S8 The primer sequences of BpYABs used in qRT-PCR
Gene Name	Forward primer (5’-3’)	Reverse primer (5’-3’)
BpYAB1	GTCAAGTACATCTAGCGAGCCG	ACTGATGCAGCTGGTGGATTT
BpYAB2	AGCACGAACAACCTGCTAGGT	CTTGCTGCCATCTAGCTTTAGC
BpYAB3	CCGCCTAGAGGAGTAGCTCAT	AGGCATGAGACCAAAGTGGA
BpYAB4	AAGATCGGCTGCTGAGGAGA	TCAGGCATTAGTCCAAGGTGG
BpYAB5	GCTGAGGAAAGGGTTGTGAAC	ACCCATTGTCCAGCTTAGTCTG
BpYAB6	CTTCCGACAATGAAGATGGAGA	CTTCTTTGTACTCAATTGGAGGG

## Sheet: Table S9
Table S9 The FPKM values of four BpYAB genes in bud and developmental leaves from RNA-seq data
Gene Name	Bud-1	Bud-2	Bud-3	Leaf 1-1	Leaf 1-2	Leaf 1-3	Leaf 2-1	Leaf 2-2	Leaf 2-3	Leaf 3-1	Leaf 3-2	Leaf 3-3
BpYAB2	54.1601	40.9977	59.3402	73.5847	42.2331	75.702	33.7757	34.4708	40.8057	21.1968	24.916	27.4396
BpYAB3	113.057	88.9604	88.9803	140.199	61.946	90.8386	53.1424	54.7211	63.2385	15.1122	11.0118	19.4877
BpYAB4	64.6436	51.2214	67.7815	95.1217	47.6068	83.4312	13.4033	24.4168	21.1341	6.48555	9.09983	7.21192
BpYAB5	91.0454	70.2856	79.5295	263.533	180.766	232.629	104.392	191.611	175.444	77.9044	86.5574	95.6885
